1 Polygenic adaptation, clonal interference, and the evolution of mutators in experimental  
2 *Pseudomonas aeruginosa* populations

3

4 Katrina B. Harris<sup>1</sup>, Kenneth M. Flynn<sup>2</sup>, and Vaughn S. Cooper<sup>1</sup>

5

6 <sup>1</sup>Department of Microbiology and Molecular Genetics, and Center for Evolutionary Biology and  
7 Medicine, University of Pittsburgh, Pittsburgh, Pennsylvania, USA.

8

9 <sup>2</sup>Department of Molecular, Cellular, and Biomedical Sciences, University of New Hampshire,  
10 Durham, NH, USA.

11 **Abstract:**

12 In bacterial populations, switches in lifestyle from motile, planktonic growth to surface-  
13 grown biofilm is associated with persistence in both infections and non-clinical biofilms. Studies  
14 have identified the first steps of adaptation to biofilm growth but have yet to replicate the  
15 extensive genetic diversity observed in chronic infections or in the natural environment. We  
16 conducted a 90-day long evolution experiment with *Pseudomonas aeruginosa* PA14 in growth  
17 media that promotes biofilm formation in either planktonic culture or in a biofilm bead model.  
18 Surprisingly, all populations evolved extensive genetic diversity with hundreds of mutations  
19 maintained at intermediate frequencies, while fixation events were rare. Instead of the expected  
20 few beneficial mutations rising in frequency through successive sweeps, we observe a  
21 remarkable 40 genes with parallel mutations spanning both environments and often on  
22 coexisting genotypes within a population. Additionally, the evolution of mutator genotypes (*mutS*  
23 or *mutL* mutator alleles) that rise to high frequencies in as little as 25 days contribute to the  
24 extensive genetic variation and strong clonal interference. Parallelism in several transporters  
25 (including *pitA*, *pntB*, *nosD*, and *pchF*) indicate probable adaptation to the arginine media that  
26 becomes highly alkaline during growth. Further, genes involved in signal transduction (including  
27 *gacS*, *aer2*, *bdIA*, and PA14\_71750) reflect likely adaptations to biofilm-inducing conditions. This  
28 experiment shows how extensive genetic and phenotypic diversity can arise and persist in  
29 microbial populations despite strong selection that would normally purge diversity.

30 **Importance:**

31           How biodiversity arises and is maintained in clonally reproducing organisms like  
32 microbes remains unclear. Many models presume that beneficial genotypes will outgrow others  
33 and purge variation via selective sweeps. Environmental structure like biofilms may oppose this  
34 process and preserve variation. We tested this hypothesis by evolving *P. aeruginosa*  
35 populations in biofilm-promoting media for three months and found both adaptation and  
36 diversification that were mostly uninterrupted by fixation events that eliminate diversity. Genetic  
37 variation tended to be greater in lines grown using a bead model of biofilm growth but many  
38 lineages also persisted in planktonic lines. Convergent evolution affecting dozens of genes  
39 indicates that selection acted on a wide variety of traits to improve fitness, causing many  
40 adapting lineages to co-occur and persist. This result demonstrates that some environments  
41 may expose a large fraction of the genome to selection and select for many adaptations at  
42 once, causing enduring diversity.

43

#### 44 **Introduction:**

45 Bacterial populations inhabit countless environments along a continuum of spatial  
46 structure, ranging from a well-mixed liquid to rugged, solid surfaces. Growth on surfaces is  
47 associated with biofilm production that in turn generates nutrient and oxygen gradients  
48 (Stoodley et al. 2002; Dietrich et al. 2013), but so too does the metabolic activities of  
49 neighboring cells. Life in confined spaces results in varied levels of nutrients, waste, and  
50 signaling molecules that may alter selective forces on parts of the population and create novel  
51 ecological opportunities (Poltak and Cooper 2011). These physical differences are hypothesized  
52 to select for mutations in biofilm populations distinct from well mixed cultures. Experimental  
53 microbial evolution (EME) studies have found that biofilm populations select for different  
54 mutations than those seen in planktonic growth, and the greater environmental structure of the  
55 biofilm produces increased genetic diversity (Rainey and Travisano 1998; Boles et al. 2004;  
56 Habets et al. 2006; Wong et al. 2012; Traverse et al. 2013; Flynn et al. 2016; Santos-Lopez et  
57 al. 2019). Despite this process of diversification, replicate populations propagated in both biofilm  
58 and planktonic conditions exhibit high levels of both phenotypic and genetic parallelism,  
59 suggesting some measure of predictability within the same environment (Wong et al. 2012;  
60 Tognon et al. 2017; Yen and Papin 2017; Sanz-García et al. 2018; Turner et al. 2018). We still  
61 have much to learn about how the biofilm life cycle influences evolutionary dynamics and  
62 processes, including the relative roles of mutation and selection, and whether biofilm growth  
63 becomes the dominant selective force relative to other stresses like nutrient limitation or  
64 external toxins.

65 *Pseudomonas aeruginosa* is an opportunistic pathogen found in soil and water and is  
66 known for its ability to thrive in numerous environments. *P. aeruginosa* is a highly studied  
67 pathogen due to its association with poor outcomes in clinical settings when it forms biofilm  
68 infections within patients (Eichner et al. 2014; Feliziani, Marvig, Luján, Moyano, Di Rienzo, et al.  
69 2014; Schick and Kassen 2018; Gloag et al. 2019). Adaptation to biofilm growth has been

70 indicated as a cause of infection persistence in numerous studies (Parsek and Singh 2003;  
71 Periasamy and Kolenbrander 2009; Yildiz and Visick 2009). This adaptation manifests as  
72 important colony phenotypes such as mucoidy and rugose small colony variants (RSCVs) as  
73 well as the loss of virulence factor production and altered cell surface virulence determinants  
74 (Ashish et al. 2013; Kim et al. 2014). Several studies have been performed to identify some of  
75 the first steps of adaptation to a biofilm environment but these studies have yet to replicate the  
76 high levels of genetic diversity often seen in chronic biofilm-associated infections, such as those  
77 of the airways of cystic fibrosis patients (Lieberman et al. 2011; Hogardt and Heesemann 2013;  
78 Marvig et al. 2015; Kruczek et al. 2016; Schick and Kassen 2018; Gloag et al. 2019).

79 We previously conducted a long-term evolution experiment over 90 days of propagation  
80 (~600 generations) to explore how the population-genetic dynamics of *P. aeruginosa* adaptation  
81 differ in a model of the biofilm life cycle compared to a well-mixed environment (Flynn et al.  
82 2016). Major findings included that biofilm populations evolved greater phenotypic and  
83 ecological diversity than planktonic populations, and some of these phenotypes were linked to  
84 probable biofilm adaptations. The different colony types that evolved within populations  
85 represented distinct growth strategies that were most productive in mixture, suggesting a  
86 process of niche partitioning and facilitation among lineages (Flynn et al. 2016). This is strikingly  
87 opposed to the phenotypic parallelism observed in previous studies (Rainey and Travisano  
88 1998; Traverse et al. 2013). A preliminary survey of the genomes of these lineages revealed  
89 that this diversity was in part caused by the evolution of *mutS* and *mutL* genotypes that  
90 increased mutation rate, a genotype also observed in many chronic infections of *P. aeruginosa*  
91 (Ciofu et al. 2010; Macià et al. 2011; Warren et al. 2011; López-Causapé et al. 2013). Here, we  
92 use longitudinal whole-population genome sequencing (WPGS) to study the underlying  
93 evolutionary dynamics of this experiment at high resolution. Some genes that experienced  
94 mutational parallelism contribute to arginine metabolism, the sole carbon and nitrogen source in  
95 these experiments. More surprising, in light of the duration of the experiment and the strength of

96 selection in these populations, few mutations actually fixed in any of the six populations and  
97 much more genetic diversity was preserved than has been seen in previous evolution  
98 experiments. We discuss potential evolutionary and phenotypic causes for this maintenance of  
99 such levels of high genetic diversity.

100

## 101 **Results:**

### 102 **Experimental evolution**

103 Six populations of *P. aeruginosa* strain PA14 (PA), a strain already proficient in forming  
104 biofilm, were propagated for 90 days (approximately 600 generations, or ~6.6 generations per  
105 day) to examine the population-genetic dynamics of prolonged growth in a biofilm life cycle.  
106 Bacteria that attach to a polystyrene bead are transferred daily to a new tube containing a fresh  
107 bead (populations B1, B2, B3), and compared to passages of serial 1:100 dilutions (planktonic  
108 populations P1, P2, P3) as described previously (Poltak and Cooper 2011; Flynn et al. 2016)  
109 (Figure S1). Biofilm and planktonic populations were designed to ensure a similar transfer size  
110 and number of generations per day, as reported previously (Flynn et al. 2016). The culture  
111 medium was M63 media containing arginine as the sole carbon and nitrogen source and  
112 supplemented with 25  $\mu$ M iron (see methods), a combination which has been shown to promote  
113 biofilm production in *Pseudomonas* species (Bernier et al. 2011). We hypothesized that this  
114 media would allow us to bypass many known first-step adaptive mutations, and instead allow us  
115 to look at the subsequent steps of adaptation that are less known. We sought to study these  
116 population wide adaptations at both phenotypic and genetic levels.

117 After 90 days, all six populations became vastly more fit than ancestral PA14, with  
118 selective coefficients 10-fold greater ( $r$  between 3 and 5; see methods for selection calculation)  
119 than the fitness gains observed in other evolution experiments of similar duration (Lenski et al.  
120 1991; Rainey and Travisano 1998; Barrett et al. 2005; Ellis et al. 2012; Wong et al. 2012)  
121 (Figure S2, Table S1; see methods). Five populations increased their maximum growth rate

122 (Vmax; Figure S3a) and five populations evolved to become less motile than the ancestor  
123 (Figure S3b). Despite selection to attach to a plastic bead each day, presumably by producing  
124 biofilm, only the B3 population evolved higher biofilm production than the ancestor as measured  
125 by the standard crystal violet assay. In contrast, four populations, including bead populations B1  
126 and B2, evolved lower biofilm production (Figure S3c). This result may reflect the high starting  
127 biofilm production of PA14 in these conditions being difficult to improve. We performed a  
128 principal component analysis on these three phenotypes (Figure 1a) and found that evolved  
129 populations were distinguished from the ancestor but not clearly separated by treatment.

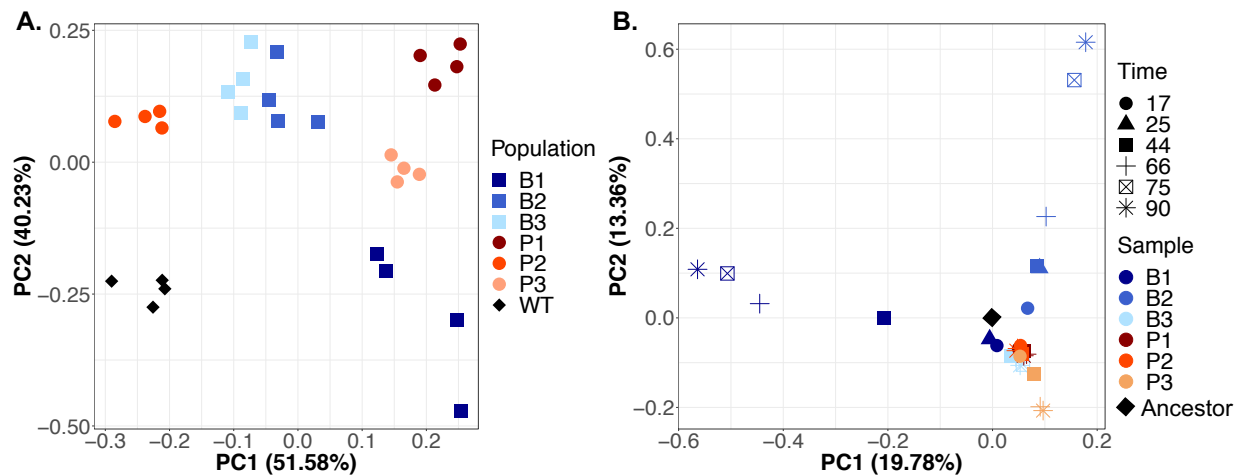

130

131

132 **Figure 1. Divergent phenotypes linked to fitness and genotypes distinguish each evolved**

133 **population after 90 days of passage. (A) PCA of evolved phenotypes including biofilm**

134 **production, maximum growth rate (Vmax), and swimming motility (n = 4 for each population).**

135 **Blue squares are biofilm populations, red circles are planktonic populations, and the ancestor is**

136 **indicated by black diamond(s). The first three components explain 51.58%, 40.23%, and 8.19%**

137 **of variance. (B) PCA of mutation identities and frequencies at Days 17, 25, 44, 66, 75, and 90.**

138 **Replicate data points for each population are indicated in color. Colors are the same as in A, but**

139 **shape indicates time through the experiment. The top four components explain 19.78%,**

140 **13.36%, 9.31%, and 6.5% of the variance.**

141

## 142 **High genetic diversity arose and persisted in all populations**

143 We used longitudinal WPGS to characterize the genetic diversity and evolutionary  
144 dynamics of each lineage with an average depth of  $617.1 \pm 142.3$  reads per sample. A total of  
145  $145.7 \pm 55$  mutations were detected per population over the course of the 90-day time period  
146 (see methods for filtering criteria). Biofilm populations accumulated more mutations (535, with  
147 382 found at day 90) over the 90 days than planktonic populations (339, with 201 found at day  
148 90; Table 1). This number of mutations is remarkable in comparison to previous evolution  
149 experiments. For example, *Burkholderia cenocepacia* populations were propagated using the  
150 same bead model, for twice the transfer days, and 37 mutations were identified in the best-  
151 studied population (Traverse et al. 2013). Biofilm populations were sampled at two more time  
152 points than planktonic allowing for a more accurate representation of their complex dynamics,  
153 discussed more below.

154

|                                   |            |
|-----------------------------------|------------|
| <b>Total cumulative mutations</b> | <b>874</b> |
| Biofilm only                      | 535        |
| Planktonic only                   | 339        |
| <b>Total mutations at day 90</b>  | <b>583</b> |
| Biofilm only                      | 382        |
| Planktonic only                   | 201        |
| <b>Total fixed mutations</b>      | <b>53</b>  |
| Biofilm only                      | 48         |
| Planktonic only                   | 5          |
| <b>Total fixation events</b>      | <b>10</b>  |

155

156 **Table 1.** Summarized mutation statistics from all six populations following 90 days of  
157 experimental evolution.



158 A known phenomenon associated with positive selection is the increase in  
159 nonsynonymous (NS) mutations over synonymous (S) mutations (Kryazhimskiy and Plotkin  
160 2008; Lieberman et al. 2011). In following with this trend, the normalized NS/S ratio for  
161 planktonic populations averaged 1.73 and for biofilm populations 2.34. A total of 31 indels were  
162 also identified in the six evolved populations (Table S2, Table S3) while, interestingly, no large  
163 structural variants were detected. A large number of intergenic mutations were also identified  
164 (233 mutations, or 27.5%), many in likely promoter or terminator regions. The importance of  
165 intergenic mutations still remains unclear, however recent work has implicated intergenic  
166 regulatory regions as critical in *Pseudomonas aeruginosa* evolution in the laboratory and during  
167 infections (Feliziani, Marvig, Luján, Moyano, Rienzo, et al. 2014; Khademi et al. 2019).

168 We hypothesized that the structured biofilm environment would maintain greater genetic  
169 diversity than mixed liquid culture, but this ecological process is potentially at odds with the  
170 diversity-purging effect of selection on beneficial mutations. For example, a mutation that  
171 generally improves growth would be expected to sweep and eliminate genetic variation, even  
172 though the biofilm growth is predicted to increase the probability of coexisting subpopulations  
173 (Habets et al. 2006; Traverse et al. 2013; Martin et al. 2016). Planktonic populations would also  
174 be subject to similar effects of selective sweeps but their admixture might limit the cooccurrence  
175 of contending mutations (Lang et al. 2013). To summarize, comparing populations at a given  
176 time point might not adequately capture the longitudinal ecological and evolutionary dynamics  
177 affecting diversity. For this reason, we sampled biofilm populations at six time points (17, 25, 44,  
178 66, 75, and 90 days) and planktonic populations at four time points (17, 44, 66, and 90 days)  
179 and focused on temporal changes in all mutations supported by three reads on each of both  
180 strands.

181 The nucleotide diversity of biofilm populations tended to be greater at the end of the  
182 experiment than after only 17 transfers (day 17 vs day 90:  $p = 0.0478$ ,  $t = 2.821$ ,  $df = 4$  via two  
183 tailed t-test). Planktonic populations continued to select for new mutations throughout the

184 experiment, but they did not become more diverse by day 90 than at day 17 ( $p = 0.239$ ,  $t =$   
185  $1.384$ ,  $df = 4$  via two tailed t-test), indicating a process where new mutations were displacing  
186 older ones. Biofilm populations also tended toward greater diversity than planktonic populations  
187 later in the experiment, albeit not significantly (planktonic vs biofilm, day 90,  $p = 0.0749$ ,  $t =$   
188  $2.394$ ,  $df = 4$  via two tailed t-test; Figure S4a). These findings are consistent with the greater  
189 morphological variation in biofilm populations than planktonic ones that we reported previously  
190 (Flynn et al. 2016).

191 A major cause of the high genetic diversity is the prevalence of mutator alleles,  
192 mutations that cause a genome-wide increase in mutation rate, in four populations. In all biofilm  
193 populations and one planktonic population (P3) NS mutations in the DNA mismatch repair  
194 (MMR) genes *mutS* and *mutL* became frequent or fixed. Two populations, B1 and B2,  
195 independently evolved the same *mutS* mutation (T112P) that has been shown to lower affinity  
196 for heteroduplex DNA in *E. coli* (Junop et al. 2003) and results in a 116-fold increase in mutation  
197 rate in isogenic mutants (Figure S5). Interestingly, this T112P mutation occurs within a  
198 homopolymeric region that may be a mutational hotspot. Genotypes containing these mutations  
199 fix in populations B1 and B2 by days 44 and 25, respectively (Figure 2, red trajectories). A  
200 premature stop mutation (W307\*) in *mutS* also rose to intermediate frequency (53%) in the P3  
201 population by day 90. While we did not create an isogenic mutant of this mutator allele, we  
202 predict that it acts as other *mutS* mutations with a roughly 100-fold increase in mutation rate.  
203 The rise of *mutS* alleles caused these populations to diverge genetically from the others, as  
204 seen from PCA analysis of mutational frequency data (Figure 1B). A fourth mutator genotype  
205 evolved in the B3 population by a mutation in *mutL* (D467G) that caused a 16-fold increase in  
206 mutation rate and rose to 83% frequency by day 90 (Figure 2; Figure S5). Consequently, each  
207 of these mutator populations became enriched for transition and single-base indel mutations,  
208 signatures typical of defects in mismatch repair (Sniegowski et al. 1997; Shaver et al. 2002;  
209 Couce et al. 2017) (Table S2).

210

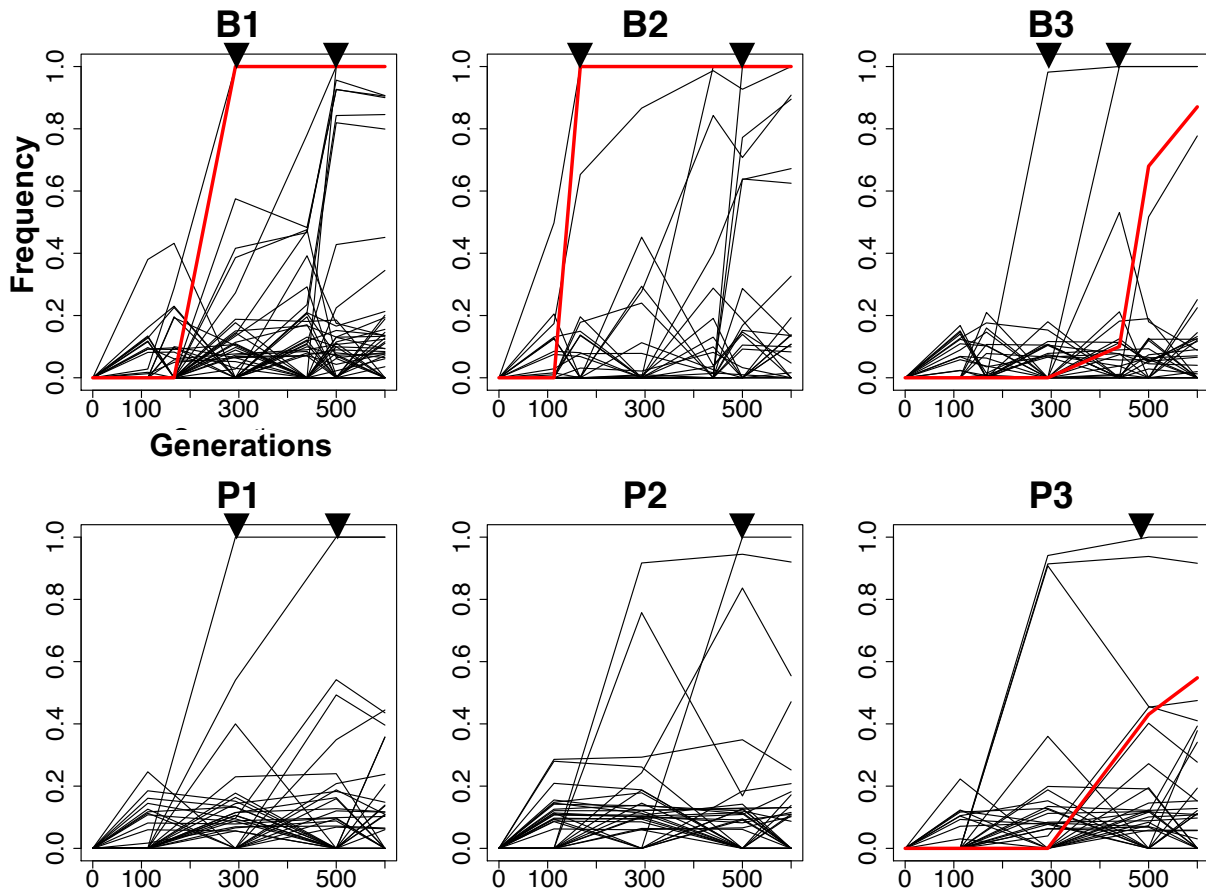

211

212 **Figure 2.** Evolutionary trajectories of inferred genotypes within six PA populations under biofilm  
213 (B) or planktonic (P) selection. Genotypes containing mutator alleles are colored red. Triangles  
214 indicate timing of the ten fixation events observed throughout the study.

215

216

## 217 **High diversity is a byproduct of clonal interference**

218 While mutator alleles are not beneficial themselves (Sniegowski et al. 1997) and their  
219 dominant effect is to introduce neutral or deleterious mutations, they can facilitate the  
220 acquisition of combinations of beneficial mutations. A more beneficial genotype that has  
221 acquired several beneficial mutations may be able to outcompete less fit lineages with fewer  
222 mutations and overcome competition among adaptive lineages that slows their rate of increase.  
223 This dynamic is known as clonal interference or more generally as the Hill-Robertson effect  
224 (Birky and Walsh 1988; McVean and Charlesworth 2000; Comeron et al. 2008). The ability to  
225 acquire many beneficial mutations and escape clonal interference may be particularly  
226 advantageous when beneficial genetic variation is rare or, more likely in these populations,  
227 common (Smith and Haigh 1974; Buskirk et al. 2017).

228 As described above, hundreds of mutations rose to detectable frequencies in these  
229 populations within ~200 generations and persisted. We used software recently developed by  
230 our lab to group mutations into genotypes on the basis of shared, nested frequency-trajectories  
231 (cdeitrick 2020). Remarkably, between 30 and 47 genotypes each composed of multiple  
232 mutations accumulated within each population throughout the experiment (Figure 2). The  
233 number of genotypes present at a given sampled timepoint continuously increased in biofilm  
234 populations, whereas the maximum diversity in planktonic populations occurred at day 44  
235 (Supplemental Figure 4). Yet despite extensive variation at both nucleotide and genotype levels,  
236 only 10 fixation events were observed involving a total of 53 mutations. These selective sweeps  
237 involved genotypes with more mutations in biofilm populations than in planktonic lines (Table 1),  
238 and two sweeps were linked to mutator alleles in which 24 mutations fixed (Table S3). These  
239 results suggest that the biofilm environment selected larger mutational cohorts that could  
240 involve more differentiated genotypes to fix, whereas planktonic populations selected one or few  
241 mutations to fix. One cause of this pattern was the superiority of mutator genotypes containing  
242 more linked mutations, which were more common in biofilm lines. Combined, these findings

243 suggest that the rapid rise of mutator alleles may have enabled escape from clonal interference,  
244 especially in biofilms.

245 To better understand the evolutionary processes within these populations, we visualized  
246 genotype frequencies over time by constructing Muller plots (Traverse et al. 2013; Scribner et  
247 al. 2019). These figures demonstrate, for example, how one genotype spreads by evolving  
248 secondary, nested, genotypes and outcompeting other preexisting genotypes. The most  
249 conspicuous genotype invasions were the mutator genotypes in populations B1 and B2  
250 containing 11 or 13 mutations (Figure 3; mutator ancestry depicted in color and fixation events  
251 depicted by vertical lines). These figures also illustrate effects of particularly consequential  
252 mutations that overtake others or give rise to further diversity as well as genotypes that arise  
253 simultaneously and coexist for hundreds of generations. This latter dynamic is consistent with  
254 either clonal interference or genotypes adapting to inhabit discrete niches, possibilities we  
255 evaluate below.

256

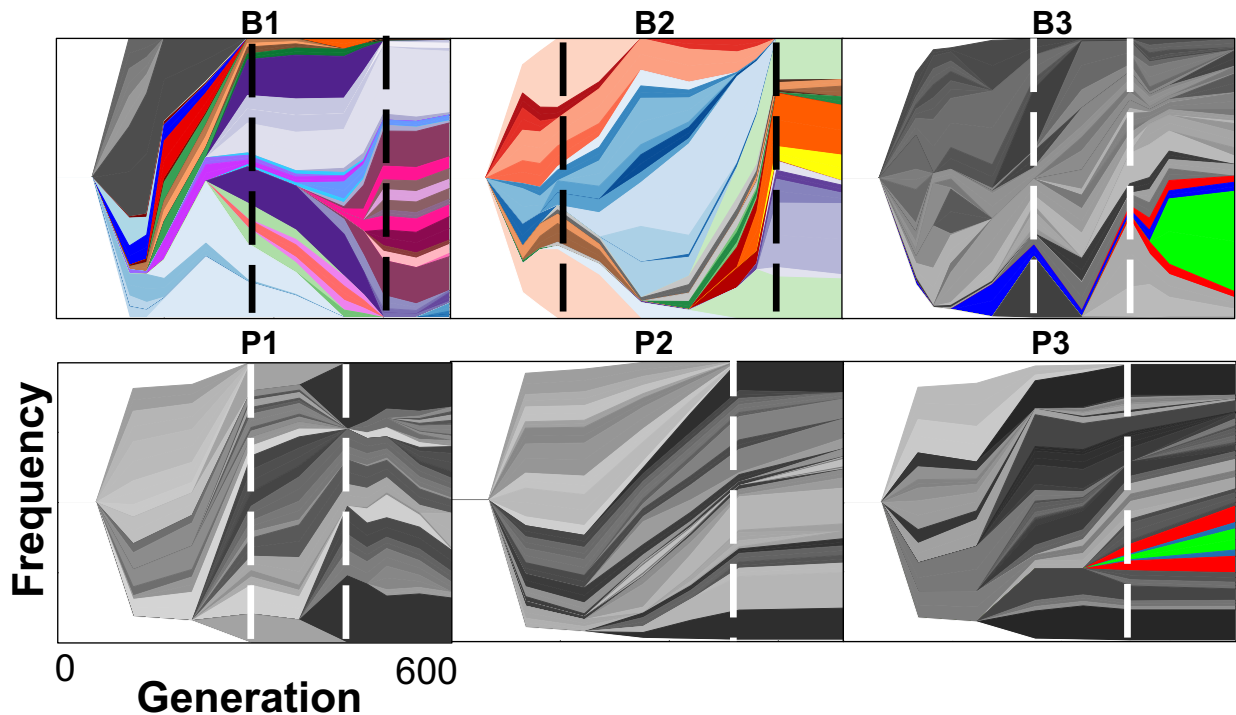

257

258 **Figure 3. Genealogy and genotype frequencies over time.** Each shade or color represents a  
259 different genotype and vertical area corresponds to genotype frequency, inferred by LOLIPop  
260 (cdeitrick 2020). Shades of grey indicate genotypes not on a mutator background, whereas  
261 colors indicate genotypes on a mutator background. Dashed lines indicate timing of fixation  
262 events predicted by genotype trajectories (Figure 2). Biofilm populations are on the top row and  
263 planktonic populations are on the bottom row.  
264

265 To test the genotype prediction algorithm producing these Muller plots and to identify  
266 other mutations undetected due to their low frequencies or sequencing coverage, we  
267 sequenced 26 clones from population B1 and 10 from population P1. B1 clones contained 48-  
268 138 mutations per clone whereas clones from the P1 population only contained between 14-28  
269 mutations, results consistent with population sequencing results. However, many of these  
270 mutations were previously undetected in the metagenomes, indicating much greater genetic  
271 variation at frequencies below our detection limits from population sequencing (Figure 4) (Good  
272 et al. 2017). The 26 B1 clones belonged to a total of nine competing genotypes at day 90  
273 (Figure S6), whereas the 10 planktonic clones only belonged to two distinct genotypes (Figure  
274 S7). This finding confirms that the biofilm population maintained greater genetic diversity than  
275 the planktonic population at the end of the experiment.

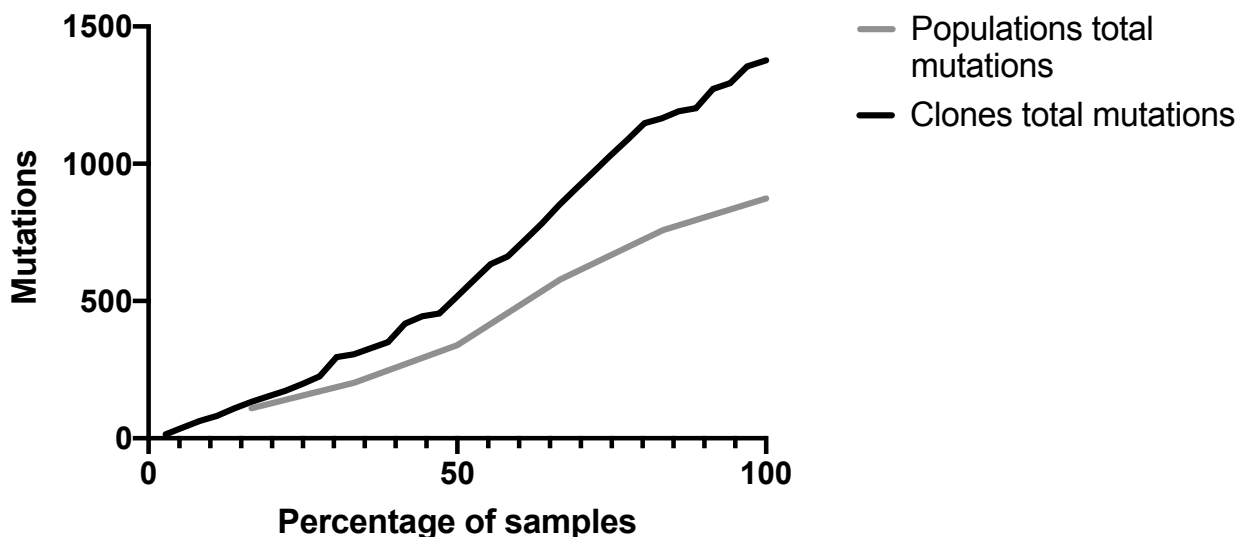

276  
277 **Figure 4.** Clonal sequencing identifies more mutational variation than population level  
278 sequencing. Collector's curve of total mutations identified by both population and clonal  
279 sequencing. To enable comparison results are plotted by the percentage of samples obtained (6  
280 populations or 36 clones).

281

282           Another goal of sequencing these clones was to determine the genetic causes of the  
283 distinct colony morphologies that we previously showed to associate with distinct niches and  
284 phenotypes within the B1 biofilm population (Flynn et al. 2016). Each of the seven morphotypes  
285 (Figure 5a) represented a different long-lived genetic lineage (Figure 5b) that was separated by  
286 at least five mutations. This indicates the previous study that was based solely on colony  
287 morphotypes captured a good representation of the population diversity as it included seven of  
288 nine identified genotypes. We examined mutations unique to each genotype in an effort to  
289 identify those responsible for their unique phenotypes, which included the ability to form more  
290 productive biofilm communities in mixture (Table 2).

A.

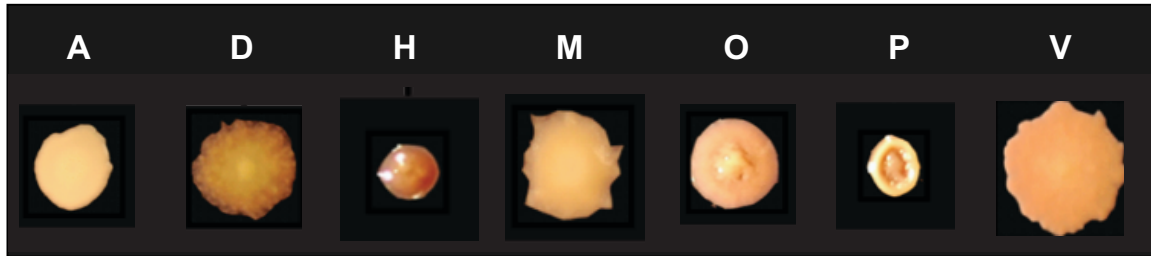

B.

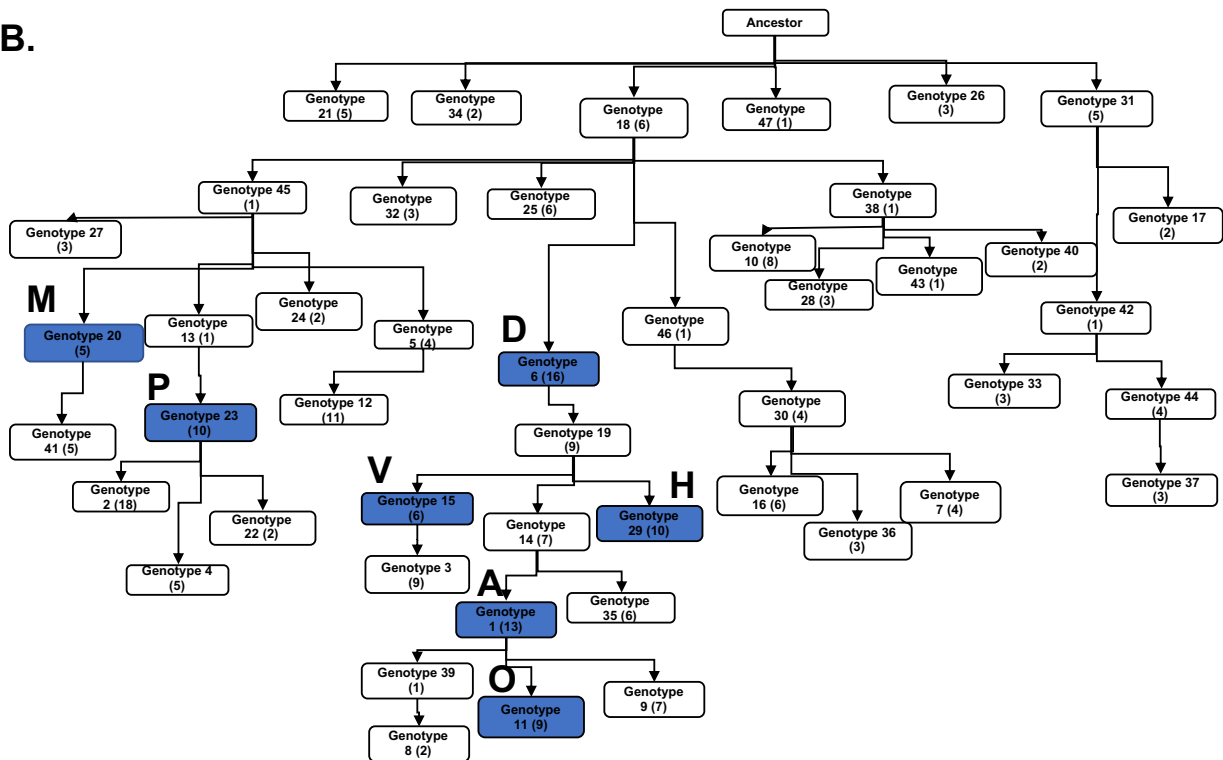

291

292 **Figure 5.** Clones representing different colony morphologies from the B1 population are all at  
 293 different points on the evolutionary trajectory of the B1 population. (A) Seven colony  
 294 morphologies were identified at day 90 and their phenotypes and ecological interactions were  
 295 characterized previously (Flynn et al. 2016). (B) Ancestry was inferred using LOLIPop (Cdeitrick  
 296 2020). Genotypes of named morphotypes are shown in blue.

297

298 For five morphotypes we can predict a genetic cause of the high biofilm formation and  
 299 the related high c-di-GMP levels. Morphotypes A and H each independently acquired mutations  
 300 in *gacS*, a sensor kinase known to be associated with high biofilm production (Davies et al.  
 301 2007), and which will be discussed more below. The additional three evolved mutations in  
 302 separate genes that have all been linked to *Pseudomonas* biofilm production previously: mutant



303 D acquired a mutation in the sensor histidine kinase *rscC* (Nicastro et al. 2009), M acquired a  
304 mutation in the type III secretion system gene *pscQ* (Wagner et al. 2003), and V acquired a  
305 mutation in the two component response regulator PA14\_52250 (Francis et al. 2017; Badal et  
306 al. 2020) (Table 2). While these are not the only mutations that distinguish the morphotypes  
307 from one another, these are leading candidates that could produce their varied biofilm  
308 phenotypes.

| Clone | Gene                    | PA01 ortholog    | Pseudocap function                                        |
|-------|-------------------------|------------------|-----------------------------------------------------------|
| A     | bkdA1                   | bkdA1            |                                                           |
|       | flgB                    | flgB             | Motility & Attachment                                     |
|       | oprC                    | oprC             | Transport of small molecules                              |
|       | oprC                    | oprC             | Transport of small molecules                              |
|       | PA14_06960              | PA0534           | Putative enzymes                                          |
|       | PA14_10830              | no PA01 ortholog | Transcriptional regulators                                |
|       | PA14_14530>/>PA14_14540 |                  |                                                           |
|       | gacS                    | gacS             | Two-component regulatory systems                          |
|       | PA14_52760              | PA0891           | Transport of small molecules                              |
|       | PA14_72320              | PA5478           | Membrane proteins                                         |
|       | ppc                     | ppc              | Central intermediary metabolism                           |
|       | thrB>/<PA14_72520       |                  |                                                           |
|       | TrpB                    | TrpB             | Amino acid biosynthesis and metabolism                    |
| D     | oprH</>napE             | oprH</>napE      |                                                           |
|       | PA14_04050              | PA0227           | Biosynthesis of cofactors, prosthetic groups and carriers |
|       | PA14_06030              | PA0461           | Fatty acid and phospholipid metabolism                    |
|       | PA14_10910              | PA4096           | Transport of small molecules                              |
|       | PA14_19450              | PA3453           | Hypothetical, unclassified, unknown                       |
|       | PA14_23670              | PA3127           | Antibiotic resistance and susceptibility                  |
|       | PA14_29260              | PA2696           | Transcriptional regulators                                |
|       | PA14_31470              | PA2557           | Fatty acid and phospholipid metabolism                    |
|       | PA14_48210              | PA1239           | Putative enzymes                                          |
|       | PA14_55380</>PA14_55390 |                  |                                                           |
|       | magD                    | magD             | Adaptation, Protection                                    |

|          |                         |                     |                                                              |
|----------|-------------------------|---------------------|--------------------------------------------------------------|
|          | PA14_66380              | PA5021              | Membrane proteins                                            |
|          | pauR                    | pauR                | Carbon compound catabolism                                   |
|          | PA14_71750              | PA5437              | Transcriptional regulators                                   |
|          | pvdJ                    | pvdJ                | Adaptation, Protection                                       |
| <b>H</b> | algU</>nadB             | algU</>na<br>dB     |                                                              |
|          | dsbA2                   | dsbA2               | Translation, post-translational<br>modification, degradation |
|          | gbuR                    | gbuR                | Transcriptional regulators                                   |
|          | PA14_19190              | PA3471              | Central intermediary metabolism                              |
|          | prkA                    | prkA                |                                                              |
|          | fliT                    | fliT                | Motility & Attachment                                        |
|          | gacS                    | gacS                | Two-component regulatory systems                             |
|          | PA14_58960              | no PA01<br>ortholog | Hypothetical, unclassified, unknown                          |
|          | PA14_71750              | PA5437              | Transcriptional regulators                                   |
|          | rpoB                    | rpoB                | Transcription, RNA processing and<br>degradation             |
| <b>M</b> | flhA                    | flhA                | Motility & Attachment                                        |
|          | PA14_07810              | PA0599              | Hypothetical, unclassified, unknown                          |
|          | PA14_13150              | PA3921              | Transcriptional regulators                                   |
|          | PA14_43150</>PA14_43160 |                     |                                                              |
|          | pscQ                    | pscQ                | Protein secretion/export apparatus                           |
| <b>O</b> | PA14_12160              | PA3992              | Putative enzymes                                             |
|          | PA14_14390</>PA14_14400 |                     |                                                              |
|          | PA14_27610>/>PA14_27620 |                     |                                                              |
|          | PA14_27770              | PA2812              | Transport of small molecules                                 |
|          | PA14_51510              | PA0988              | Hypothetical, unclassified, unknown                          |
|          | pstA                    | pstA                | Transport of small molecules                                 |
|          | spuF                    | spuF                | Transport of small molecules                                 |
|          | str                     | str                 | Antibiotic resistance and<br>susceptibility                  |
|          | trbL                    | trbL                |                                                              |
| <b>P</b> | lpxC                    | lpxC                | Cell wall / LPS / capsule                                    |
|          | mdoH                    | mdoH                | Cell wall / LPS / capsule                                    |
|          | PA14_03000              | PA0242              | Putative enzymes                                             |
|          | PA14_13140>/>PA14_13150 |                     |                                                              |
|          | PA14_1340>/<PA14_13350  |                     |                                                              |
|          | PA14_18760              | PA3523              | Transport of small molecules                                 |
|          | PA14_43150              | PA1652              | Membrane proteins                                            |

|          |                   |                  |                                                           |
|----------|-------------------|------------------|-----------------------------------------------------------|
|          | pilF              | pilF             | Motility & Attachment                                     |
|          | purB              | purB             | Amino acid biosynthesis and metabolism                    |
|          | rep               | rep              | DNA replication, recombination, modification and repair   |
| <b>V</b> | rsmE              | rsmE             | Translation, post-translational modification, degradation |
|          | pqiB              | no PA01 ortholog | Hypothetical, unclassified, unknown                       |
|          | PA14_52250        | PA0929           | Two-component regulatory systems                          |
|          | rsml              | rsml             | Translation, post-translational modification, degradation |
|          | thrB>/<PA14_72520 |                  |                                                           |
|          | til5a>/>pIdA      |                  |                                                           |

309 Table 2. Unique mutations found in seven clones from an experimentally evolved biofilm  
310 populations with distinct ecological roles (Flynn et al. 2016).  
311

### 312 **Targets of selection**

313 Evolving large populations ( $>10^8$ ) over a few hundred generations results in higher  
314 impacts of selection relative to the effect of drift, even when mutation rates increase. This allows  
315 us to predict that genotypes that rise to a detectable frequency in an evolve-and-resequence  
316 experiment like this one are fitter than their ancestor. Further, parallel, nonsynonymous  
317 mutations affecting the same gene provides strong evidence of an adaptation (Cooper 2018).  
318 Across all six populations, 53 mutations reach 100% frequency, as part of the 10 genotype  
319 sweeps (Table 1), and each affected a unique gene except for two each in *mutS*, *pitA*, and *rpoB*  
320 (Table S3). However, the population dynamics depicted in Figure 3 and the clonal genomes  
321 summarized in Figure 5 demonstrate substantial genetic variation that did not fix. We suspected  
322 a more appropriate screen for parallelism might involve a lower frequency threshold than 100%.  
323 At 80% frequency, eight genes were mutated more than once: *lysC*, *mutS*, the intergenic region  
324 *fabI/ppiD*, PA14\_23670, *pitA*, PA14\_69980, PA14\_71750, and *rpoB*, and all six populations are  
325 represented. Mutations affecting these genes were either small indels or nonsynonymous  
326 substitutions predicted to alter or eliminate function. Because these genes were mutated in both  
327 planktonic and biofilm environments, they likely enable adaptation to the growth medium,

328 temperature, and dilution timing. However, these represent only 17 of the 116 mutations that  
329 reach 80% frequency, a remarkably flat distribution of high-frequency genotypes that suggests  
330 many loci may provide a benefit under these conditions.

331 We next analyzed the complete set of parallel mutations found at all frequencies for  
332 those passing a statistical threshold of expected random co-occurrence and identified 153  
333 genes or intergenic regions. Forty genes were mutated three or more times, more than would be  
334 expected by chance, accounting for 179 mutations (21.1% of all mutations; Table 3). Most  
335 mutations are nonsynonymous, as expected from positive selection, and many suggest possible  
336 adaptive phenotypes.

337 The gene with the most independent mutations, *rluB* (PA14\_23110) with 10 (8  
338 nonsynonymous; Table 3, Table S3) found in four populations at frequencies of 12.1-17.7%, is  
339 difficult to understand as an adaptation. *RluB* encodes a 23s rRNA pseudouridine synthase  
340 responsible for modifying this rRNA at position 2605 during maturation (Kaczanowska and  
341 Rydén-Aulin 2007). This gene was mutated in both biofilm and planktonic populations, indicating  
342 it is not specific to lifestyle, but all mutations clustered in residues 313 and 323 found in the  
343 disordered C-terminus of this protein. In addition, one mutation in *rluC*, another pseudouridine  
344 synthase, was detected. The literature remains vague about the specific phenotypic roles of  
345 these 23S rRNA modifications and effects of disrupting these genes are difficult to detect *in*  
346 *vitro*, but a recent study implicated these modifications as important for growth under anoxia  
347 (Krishnan and Flower 2008; Basta et al. 2017).

348 Fortunately, a wealth of literature has identified genes involved in the transition from  
349 planktonic to biofilm growth in *P. aeruginosa* (Boles et al. 2004; Eichner et al. 2014). These  
350 genes are often well annotated at <http://pseudomonas.com> for the PA14 genome or in related  
351 strains (Winsor et al. 2016). For example, five mutations in PA14\_02220, encoding the aerotaxis  
352 transducer Aer2, were selected in two biofilm and one planktonic population, and may alter the  
353 response to low oxygen that is common in biofilms (Sawai et al. 2012). In addition, three

354 independent V334G mutations were selected in each biofilm population in PA14\_46030,  
355 encoding the ortholog of biofilm dispersion locus BdlA (Morgan et al. 2006). This cytoplasmic  
356 protein contains two sensory PAS domains and a chemoreceptor domain that has been shown  
357 to sense and mediate responses to oxygen levels (Petrova and Sauer 2016). Two-component  
358 regulatory systems are also commonly implicated in this lifestyle transition, and in agreement  
359 with this model, 19 mutations in 14 genes encoding sensor kinases, response regulators, or  
360 hybrid complexes were identified (Table 3, Table S3). Likewise, nine different nonsynonymous  
361 or indel mutations affecting motility and attachment (e.g. *flgB/G*, *fliC/H/M*, *pilB/pilQ*, and *cupB3*)  
362 were selected in both biofilm and planktonic populations, indicating advantages of disrupting  
363 these processes in both lifestyles.

364 More surprising, the most common functional classification of mutated genes was  
365 transporters. Nine transporters were mutated repeatedly including: *pitA*, *pntB*, *nosD*, *pchF*,  
366 PA14\_09300, PA14\_22650, PA14\_45060, PA14\_46110, and PA14\_47900, and account for  
367 24% (43) cases of parallelism (Table3, Table S3). These transporters include genes with known  
368 function including inorganic phosphate transporter *pitA* and copper transporter *nosD*, as well as  
369 those with unknown substrates including PA14\_46110 and PA14\_45060. Of all transporters  
370 identified, *pitA* was the only one to reach frequencies above 50% in any population. This led us  
371 to identify an additional stressor acting on these populations as a byproduct of growth on  
372 arginine as a sole carbon source, which is an alkaline pH (pH = 9.2 at 24 hr) caused by the  
373 release of ammonia through deamination (Ha et al. 2014). It remains unclear how these  
374 mutated transporters produce adaptations, but they could be acting to balance pH or  
375 compensate for redox imbalances or changes in proton motive force. In addition, 18 mutations  
376 affected genes involved in various metabolic processes, including *argJ*, a key component of  
377 arginine biosynthesis expected to be no longer required due to abundant arginine in the growth  
378 media, *soxA*, encoding sarcosine oxidase (Willsey and Wargo 2016), and *cobG*, involved in the  
379 aerobic pathway of cobalmin (Vitamin B12) biosynthesis (Blanche et al. 1992). Further, three

380 mutations are observed in each of *napF*, *nqrE*, and *nuoG* potentially altering the energy  
381 conserving respiratory NADH dehydrogenase chain (Hoboth et al. 2009). We suspect that many  
382 of these nonsynonymous or indel mutations are partial loss of function mutations in metabolic  
383 pathways that are extraneous in the M63+arginine medium, though an exact mechanism is  
384 unknown.

385         There are four notable cases of mutated genes that are lifestyle specific. Four genes  
386 (*rpoB*, *gacS*, PA14\_71750, and PA14\_13150) are only mutated in biofilm populations, and in all  
387 cases, mutations rise to greater than 90% in at least one population (Table 3, Table S3).  
388 Mutations in *rpoB* and other RNA polymerase genes (*rpoACD*) have been frequently identified  
389 as adaptations during evolution experiments (O'Sullivan et al. 2005; Xiao et al. 2017). One  
390 explanation in *Escherichia coli* suggests they are adaptive for growth in minimal media by  
391 redistributing RNA polymerase from small RNA promoters (i.e. rRNA) to rate-limited promoters  
392 required for anabolic processes from a limited set of carbon sources, such as arginine in the  
393 case of this study (Conrad et al. 2010). *GacS* is a sensor/regulator hybrid known to govern a  
394 broad range of traits involved in virulence, secondary metabolism and biofilm formation through  
395 the regulation of small rRNA's (Gellatly et al. 2018). Further, *gacS* has been shown to be  
396 involved in the switch from a hyperadherent small colony phenotype back to a wild type  
397 phenotype indicating that loss of *GacS* function is beneficial in biofilms (Davies et al. 2007). The  
398 additional two biofilm specific loci, PA14\_13150 and PA14\_71750, are less understood  
399 transcriptional regulators, however PA14\_71750 has been previously associated with biofilm  
400 adaptation in *Pseudomonas* (Konikkat et al. 2020).

401         The rarity of fixation events and the high incidence of genes with parallel mutations  
402 throughout the experiment provides further evidence of competition between adaptive lineages  
403 in a population, or clonal interference (Lang et al. 2013). Given a set of genes in which  
404 mutations are adaptive, we would expect each competing genotype to contain different  
405 combinations of these mutations, with the most beneficial of them repeatedly evolving on

406 different genetic backgrounds. As predicted, we identified 55 cases of within-population gene  
 407 level parallelism (4 – 16 cases per population), with most (87%) predicted to be on different  
 408 genotypes. This result also demonstrates the polygenic capacity for adaptation by *P. aeruginosa*  
 409 growing in minimal arginine medium.  
 410

| Gene         | Total cases | Type |   |       | Biofilm | Planktonic | Highest frequency |      |      |      |      | Function |                                  |
|--------------|-------------|------|---|-------|---------|------------|-------------------|------|------|------|------|----------|----------------------------------|
|              |             | NS   | S | Indel |         |            | B1                | B2   | B3   | P1   | P2   |          | P3                               |
| <i>argJ</i>  | 3           | 3    | 0 | 0     | 2       | 1          |                   | 13.5 | 10.5 |      |      | 11.4     | Arginine biosynthesis            |
| <i>soxA</i>  | 3           | 2    | 1 | 0     | 1       | 2          |                   |      | 10.6 |      | 14.7 | 11.4     | Carbon compound catabolism       |
| <i>aer2</i>  | 5           | 3    | 2 | 0     | 3       | 2          |                   | 9.6  | 10.9 | 10.2 |      | 14.2     | Chemotaxis                       |
| <i>bdlA</i>  | 3           | 3    | 0 | 0     | 3       | 0          | 14.4              | 14.7 | 13.5 |      |      |          | Chemotaxis                       |
| <i>cobG</i>  | 3           | 2    | 0 | 1     | 1       | 2          |                   | 61.8 |      |      | 13.6 | 13.1     | Cofactor biosynthesis            |
| <i>mutS</i>  | 3           | 3    | 0 | 0     | 2       | 1          | 100               | 100  |      |      |      | 52.6     | DNA replication                  |
| <i>napF</i>  | 3           | 3    | 0 | 0     | 2       | 1          | 13.8              |      | 10.9 |      |      | 10.7     | Energy metabolism                |
| <i>nqrE</i>  | 3           | 3    | 0 | 0     | 1       | 2          |                   | 11.7 |      |      | 10.4 | 11.2     | Energy metabolism                |
| <i>nuoG</i>  | 3           | 3    | 0 | 0     | 1       | 2          | 12.9              |      |      | 12.1 | 13.9 |          | Energy metabolism                |
| PA14_53110   | 7           | 7    | 0 | 0     | 2       | 5          |                   | 14.8 | 12.8 | 12.9 | 14.4 | 12.1     | Putative enzymes                 |
| <i>psl</i>   | 7           | 7    | 0 | 0     | 3       | 4          | 16.7              | 16.4 | 14.6 | 16   | 14.7 |          | Putative enzymes                 |
| <i>algF</i>  | 3           | 3    | 0 | 0     | 2       | 1          | 13.1              |      |      | 10.6 |      |          | Secreted Factors                 |
| <i>fha1</i>  | 4           | 4    | 0 | 0     | 3       | 1          | 27.6              |      | 25.1 | 35.8 |      |          | Secreted Factors                 |
| <i>rpoB</i>  | 4           | 4    | 0 | 0     | 4       | 0          | 100               | 66   | 100  |      |      |          | Transcription                    |
| PA14_13150   | 3           | 3    | 0 | 0     | 3       | 0          | 46.3              | 17.8 | 100  |      |      |          | Transcriptional regulators       |
| PA14_18200   | 6           | 6    | 0 | 0     | 5       | 1          | 22.3              | 22.1 |      | 12.8 |      |          | Transcriptional regulators       |
| PA14_51840   | 3           | 3    | 0 | 0     | 0       | 3          |                   |      |      |      | 12   | 16.6     | Transcriptional regulators       |
| PA14_58510   | 5           | 3    | 2 | 0     | 4       | 1          | 23                | 15.7 |      | 15.5 |      |          | Transcriptional regulators       |
| PA14_71750   | 3           | 3    | 0 | 0     | 3       | 0          | 93.9              | 89.7 |      |      |      |          | Transcriptional regulators       |
| <i>dsbA2</i> | 4           | 2    | 2 | 0     | 3       | 1          | 17.1              | 11.4 | 20.8 |      |      | 10.5     | Translation                      |
| <i>rluB</i>  | 10          | 8    | 2 | 0     | 4       | 6          | 10.8              | 17.7 |      |      | 14.7 | 13.2     | Translation                      |
| <i>nosD</i>  | 5           | 4    | 1 | 0     | 1       | 4          | 14.1              |      |      |      | 15.3 | 12.9     | Transporter                      |
| PA14_09300   | 3           | 3    | 0 | 0     | 2       | 1          | 16                |      | 15.2 | 18.6 |      |          | Transporter                      |
| PA14_22650   | 7           | 7    | 0 | 0     | 3       | 4          | 43.2              | 24   |      | 40   | 28   | 37.8     | Transporter                      |
| PA14_45060   | 6           | 6    | 0 | 0     | 2       | 4          | 24.4              | 19.1 |      | 19.5 | 14.1 | 13.6     | Transporter                      |
| PA14_46110   | 7           | 7    | 0 | 0     | 1       | 6          |                   |      | 15.5 | 13.7 | 13.6 | 10.7     | Transporter                      |
| PA14_47900   | 3           | 3    | 0 | 0     | 0       | 3          |                   |      |      |      |      | 19.9     | Transporter                      |
| <i>pchF</i>  | 3           | 3    | 0 | 0     | 3       | 0          | 18.4              |      | 19   |      |      |          | Transporter                      |
| <i>pitA</i>  | 4           | 2    | 0 | 2     | 2       | 3          |                   | 91.1 |      | 100  | 75.8 | 100      | Transporter                      |
| <i>pntB</i>  | 5           | 3    | 2 | 0     | 1       | 4          | 11.3              |      |      |      | 13.9 | 15.6     | Transporter                      |
| PA14_10770   | 3           | 2    | 1 | 0     | 1       | 2          |                   | 100  |      | 12.2 |      | 26.3     | Two-component regulatory systems |
| PA14_32300   | 3           | 3    | 0 | 0     | 2       | 1          | 17.1              |      |      |      |      | 15.3     | Two-component regulatory systems |
| <i>gacS</i>  | 3           | 3    | 0 | 0     | 3       | 0          | 85.2              | 92.2 |      |      |      |          | Two-component regulatory systems |
| PA14_01160   | 3           | 3    | 0 | 0     | 1       | 2          | 14.3              |      |      |      | 13.8 |          | Unknown                          |
| PA14_20510   | 6           | 6    | 0 | 0     | 3       | 3          | 9.6               | 11.5 |      | 11   | 11.9 | 11.1     | Unknown                          |
| PA14_31070   | 10          | 5    | 5 | 0     | 4       | 6          | 19.3              | 16.9 |      | 16.2 | 16.9 |          | Unknown                          |
| PA14_32830   | 6           | 6    | 0 | 0     | 2       | 4          |                   | 13.8 | 12.7 | 12.1 | 13.5 | 12.1     | Unknown                          |
| PA14_54810   | 3           | 3    | 0 | 0     | 3       | 0          | 11.7              |      | 7.5  |      |      |          | Unknown                          |
| PA14_58070   | 6           | 6    | 0 | 0     | 5       | 1          | 13.6              | 17.5 | 12.9 |      | 20.8 |          | Unknown                          |
| PA14_69010   | 5           | 5    | 0 | 0     | 3       | 2          | 20.1              | 12.2 | 13   | 12.5 |      | 12.4     | Unknown                          |

411  
 412 **Table 2. Genes (n=40) with 3 or more evolved mutations.** NS: nonsynonymous, S:  
 413 synonymous, indel: insertion/deletion. Shading corresponds to frequency. Function from  
 414 PseudoCap via pseudomonas.com.  
 415

416 **Selected genotypes are adapted to both growth conditions and lifestyle**

417           Most cases of gene-level parallelism were shared between biofilm and planktonic  
418 conditions and indicate adaptations to the common growth media. However, minority variants  
419 could include environment specific adaptations. For example, our bead transfer model simulates  
420 the complete life cycle of the biofilm – attachment, assembly, dispersal, and reattachment –  
421 each of which could select for discrete phenotypes. To distinguish genotypes adapted to either  
422 biofilm or planktonic growth, we grew 90-day samples of evolved populations B1, B2, P1, and  
423 P2 for two days in each of these conditions independently (Figure 6). We hypothesized that  
424 these treatments would enrich genotypes adapted to either condition that we could resolve by  
425 resequencing treated populations and correlating their relative frequencies. Mutation  
426 frequencies that are higher in one environment, could represent genotypes that are adapted to  
427 biofilm or planktonic growth.



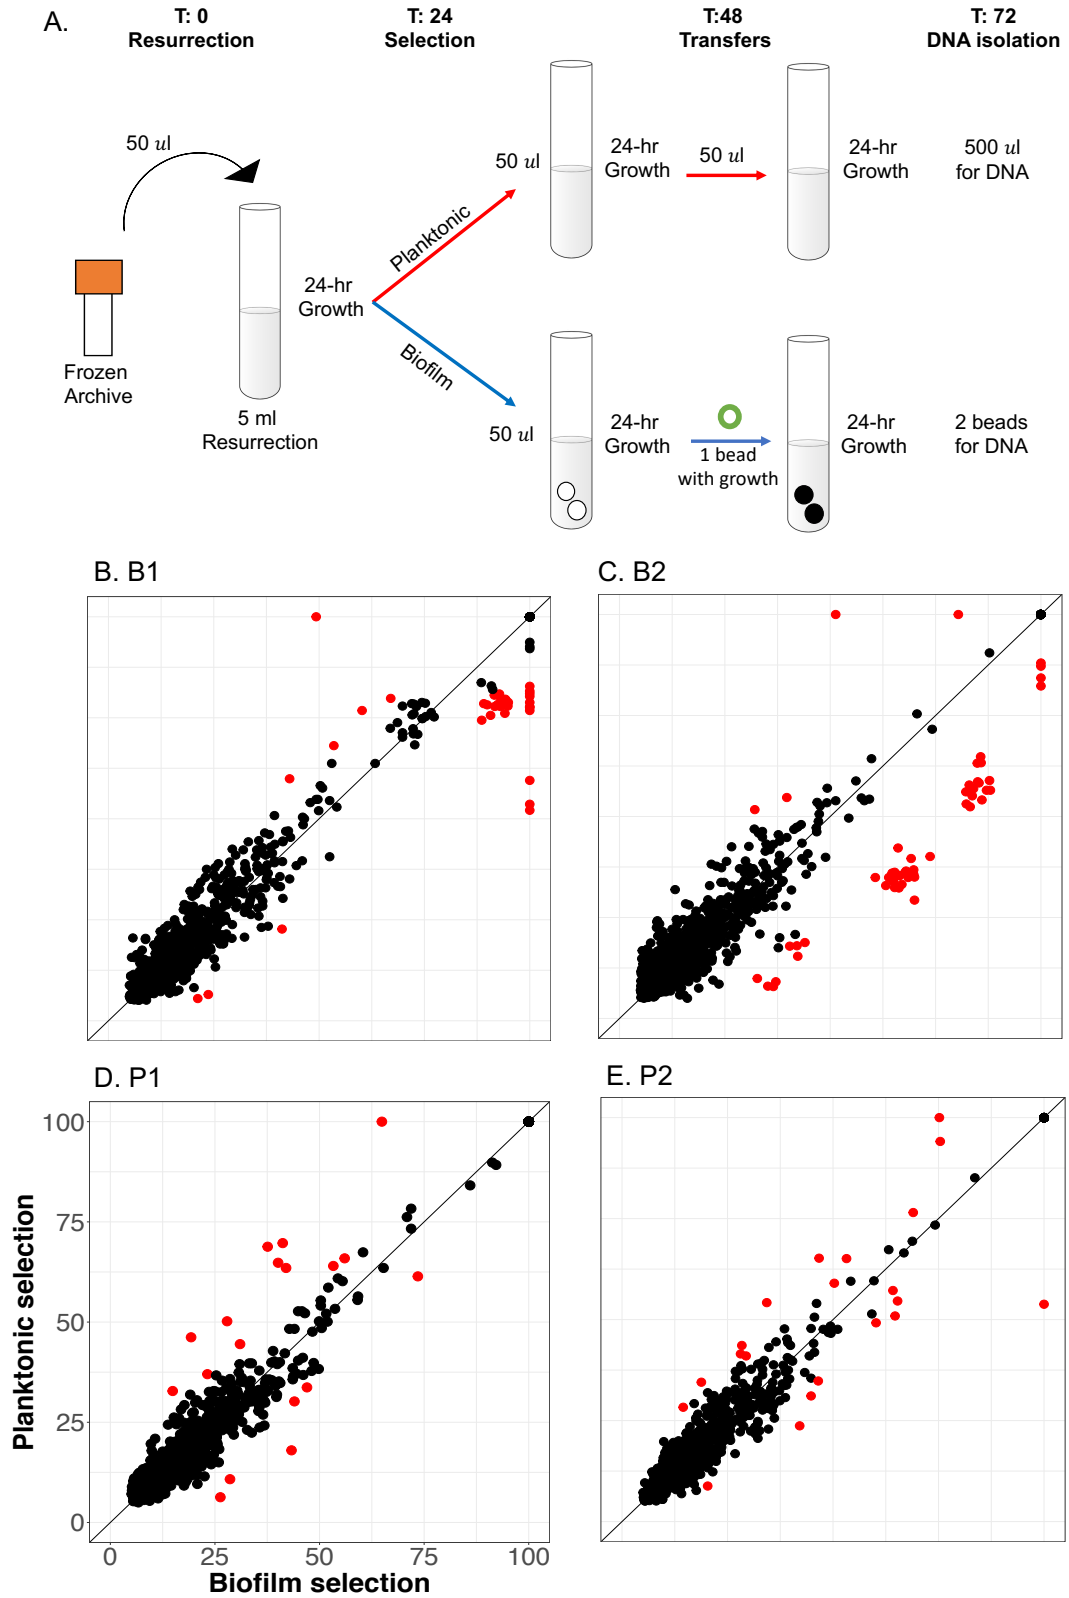

428

429 **Figure 6.** Ecological signals from WGPS data after two days of selection enriches mutations  
 430 adaptive in both planktonic and biofilm conditions. A. Methods for isolating DNA to identify

431 genotype by environment interactions. 90-day populations were resurrected from frozen  
432 archives in planktonic environments for 24 hours. Each population was then split and subjected  
433 to two days of either planktonic selection, via 1:100 daily transfers, or biofilm selection, via the  
434 bead model. After the second day of selection, 0.5 ml of planktonic culture and two biofilm  
435 beads were used to obtain the planktonic and biofilm DNA samples, respectively (see methods).  
436 B-E. Correlation of mutational frequencies when resurrected population DNA is isolated after  
437 two days of planktonic selection versus biofilm selection. B: B1 population, C: B2 population, D:  
438 P1 population, and E: P2 population. Mutations that are significantly enriched via Cook's  
439 distance (see methods) are represented in red and other mutations in black.

440  
441 In all four populations tested we found significant enrichment in both biofilm and  
442 planktonic environments (Figure 6 b-e). As expected, the two biofilm populations tested had  
443 more biofilm enriched mutations than planktonic enriched (37 and 55 biofilm enriched compared  
444 to 4 and 2 planktonic enriched), though planktonic populations had roughly equal numbers of  
445 biofilm and planktonic enriched mutations (8 and 10 biofilm enriched versus 10 and 11  
446 planktonic enriched; Table S4). Upon closer examination, the B2 population appears to contain  
447 a set of 36 mutations belonging to 4 genotypes enriched for biofilm fitness (Table S4). These  
448 genotypes also rose in frequency between days 75 to 90 in the evolution environment and  
449 appear to be generally adaptive. However, these experiments did not generally cause large  
450 (>10%) shifts in genotype frequency, which suggests that they correspond to adaptations to the  
451 overall experimental conditions and not just these growth phases.

452

#### 453 **Discussion:**

454 We used experimental evolution to examine how the opportunistic pathogen  
455 *Pseudomonas aeruginosa* (PA) adapts in laboratory culture in a medium known to promote  
456 biofilm formation (Ha et al. 2014), comparing the results of propagation by simple serial dilution  
457 with a model simulating the biofilm life cycle (Poltak and Cooper 2011). After 90 propagations  
458 (~600 generations) we observe more mutations per population, fewer fixation events, and  
459 earlier prevalence of mutator genotypes than has been observed in other evolution experiments.  
460 These findings are consistent with two potentially overlapping processes: 1) the existence of  
461 many coexisting niches, representing differing metabolic or ecological strategies within the

462 laboratory environment that select for a variety of specialized genotypes or 2) high clonal  
463 interference, involving many genotypes with roughly the same fitness competing against one  
464 another in the same niche. The repeated evolution of mutations in the same gene in the same  
465 population provides the clearest evidence of this clonal interference, because such mutants are  
466 likely to share similar phenotypes. For example, within the B1 population mutations in *gacS*  
467 evolve independently in two genotypes (Table S3). We confirmed this finding through clonal  
468 sequencing, finding clones H and A to each contain a *gacS* mutation in their distinguishing  
469 genotypes (Table 2), and further, these clones were previously shown to compete for a common  
470 niche (Flynn et al. 2016). While clonal interference likely contributes to the high genetic variation  
471 observed in these populations, we also predict that multiple niches exist within each population  
472 as our previous study indicated (Flynn et al. 2016). As further evidence, most cases of gene-  
473 level parallel mutations reached only 20-30% frequency within their respective populations  
474 (Table 3). We hypothesize that this results from multiple coexisting ecotypes with different  
475 adaptations within each population, a phenomenon that has been shown in previous evolution  
476 studies, particularly with biofilms (Traverse et al. 2013; Buskirk et al. 2017; Good et al. 2017).

477 To identify the traits selected by growth in a minimal medium containing arginine as sole  
478 energy source, we focused on the 40 loci mutated most frequently (Table 2). This medium was  
479 selected because it had previously been shown to induce high biofilm production by  
480 *Pseudomonas* (Ha et al. 2014) more specifically by increasing intracellular levels of the  
481 secondary messenger molecule c-di-GMP through the two diguanylate cyclase proteins RoeA  
482 and SadC. Further, arginine was the only amino acid to completely repress swarming motility,  
483 indicating this carbon source could be a cue to enter an attached lifestyle (Bernier et al. 2011).  
484 As we were interested in seeing how *P. aeruginosa* continues to evolve under conditions where  
485 it is already proficient for biofilm, this media choice was suitable. However, it is a naturally  
486 stressful environment because arginine catabolism by arginine deiminase produces ammonia  
487 as a byproduct and hence an alkaline environment (Cunin et al. 1986; Lu 2006). These

488 conditions are opposed to previous evolution experiments with *P. aeruginosa* in which media  
489 with multiple carbon sources are used to mimic an infection, and the medium often becomes  
490 acidic (Bernier et al. 2011; Wong et al. 2012; Ha et al. 2014; Scribner et al. 2019). The exact  
491 effects of arginine as the sole carbon and nitrogen source on the metabolic evolution of *P.*  
492 *aeruginosa* are unclear and the topic of a future study, however it is likely that arginine as a sole  
493 carbon and nitrogen source produced strong selection and may have been the dominant  
494 pressure.

495         The remarkable, unexpected consequence of this experimental design was a lack of  
496 convergent evolution of a small number of genes in replicate populations. Rather, dozens or  
497 even hundreds of mutations in nearly as many genes appear to have been selected, suggesting  
498 polygenic adaptation involving many metabolic and regulatory systems (Figure 3). Such  
499 polygenic selection in large populations increases the probability of clonal interference, wherein  
500 each lineage acquires its own combination of adaptations, but any given genotype would  
501 struggle to become dominant. Consequently, fixation events were rare, with only ten across all  
502 six replicate populations over 600 generations. Further, one of the most commonly mutated  
503 pathways was DNA mismatch repair, which increased mutation rates of linked genotypes in the  
504 four populations in which they evolved. We hypothesize these mutator genotypes provided the  
505 means to escape clonal interference (Good et al. 2014) because they had a higher probability of  
506 producing multiple, linked beneficial mutations that could outcompete other genotypes, a  
507 phenomenon that has previously been associated with the introduction of alternative forms of  
508 structure (Raynes et al. 2019).

509         Our previous study of these populations predicted that the different colony morphotypes  
510 represented lineages that had evolved to occupy distinct, interacting ecological niches within a  
511 biofilm population (Flynn et al. 2016). This genomic study confirms that these genotypes indeed  
512 represent different long-lived lineages within the B1 population. Each clone was found to  
513 possess numerous evolved mutations that are candidates for the observed phenotypic variation

514 reported previously, e.g. fitness versus the ancestral PA14 strain, levels of cyclic-di-GMP, and  
515 motility (Flynn et al. 2016). However, considerably more variation was detected by population  
516 sequencing than these lineages could explain, and likewise, sequencing additional clones  
517 resulted in an ever-increasing census of new mutations (Figure 4). These results reinforce the  
518 polygenic model of adaptation to the biofilm-inducing arginine medium and the diversity of  
519 genotypes that can generally improve growth and survival or inhabit the niches illustrated in our  
520 prior study (Flynn et al. 2016; Barghi et al. 2020). More generally, this work has implications for  
521 understanding processes underpinning the evolution and maintenance of high levels of genetic  
522 diversity, including how different nutrient sources influence this process. Although differences in  
523 the mode of growth have been shown to influence genetic diversity (O'Toole et al. 2000; Boles  
524 et al. 2004; Resch et al. 2005; Booth et al. 2011), the metabolic environment may be equally or  
525 even more important by exposing varied fractions of the genome to selection. Further, this study  
526 provides a concrete example of how microbial populations evolving in a new environment can  
527 adapt and diversify without the periodic losses of genetic variation caused by selective sweeps.  
528 This dynamic was demonstrated in the Long-Term Evolution Experiment with *E. coli* after many  
529 thousands of generations had passed and the rate of adaptation had slowed (Couce et al. 2017;  
530 Good et al. 2017). Yet here, populations amassed extreme fitness gains over only hundreds of  
531 generations while maintaining many lineages, suggesting that the *P. aeruginosa* genome  
532 encodes vast potential to meet new environmental challenges.

533

## 534 **Materials and methods**

### 535 **Experimental evolution**

536 Replicate populations were experimentally evolved as previously reported (Flynn et al,  
537 2016). Briefly, the ancestral *Pseudomonas aeruginosa* (PA14; NC\_008463) strain was  
538 reconstituted from a freezer stock in Luria-Bertani broth (LB; 1.0% w/v tryptone, 0.5% w/v yeast  
539 extract, 1.0% w/v NaCl). Six replicate populations were started with 1:100 dilutions of an

540 overnight growth into 5 mL M63 media (15 mM  $(\text{NH}_4)_2\text{SO}_4$ , 22 mM  $\text{KH}_2\text{PO}_4$ , 40 mM  $\text{K}_2\text{HPO}_4$ , 40  
541 mM galactose, 1 mM  $\text{MgSO}_4$ , 25  $\mu\text{M}$   $\text{FeCl}_2$ , and 0.4% w/v L-arginine(Bernier et al. 2011)). Three  
542 populations were propagated under liquid grown, planktonic, selection (P1, P2, P3), while three  
543 populations were propagated, concurrently, under constant biofilm selection (Poltak and Cooper  
544 2011; Traverse et al. 2013; Flynn et al. 2016) (B1, B2, B3). Planktonic selection consisted of  
545 daily 1:100 liquid dilutions into 5 mL M63 media, while biofilm selection consisted of the transfer  
546 of one 7 mm polystyrene bead every 24 hours to a new tube of 5mL M63 media containing one  
547 clean bead. This biofilm selection method requires the entire biofilm lifecycle of dispersal,  
548 attachment, and growth between every transfer. All six populations were propagated for 90 days  
549 (~600 generations) in 18x150 mm test tubes at 37 °C on a roller drum at 30 rpm.

550 Archives were made for all populations at days 17, 25, 33, 45, 66, 75, and 90 in 8%  
551 dimethyl sulfoxide (DMSO) at -80 °C. Planktonic populations were archived by freezing a 1 ml  
552 aliquot of the 24-hour culture, whereas biofilm populations were archived by sonicating 48 hr  
553 beads in 1 ml PBS, and then freezing the PBS with 8% DMSO.

#### 554 **Phenotypic characterization of evolved populations**

555 All populations were revived from freezer stocks for characterization by adding 50  $\mu\text{l}$  of  
556 freezer stock to a culture of 4:1 M63 media to LB media, with trace elements to recreate  
557 previous water mineral content (110.764 g/L  $\text{CaCl}_2$ , 0.824 g/L  $\text{MnSO}_4$ , 33.48 g/L  $\text{KBr}$ , 132.737  
558 g/L  $\text{Na}_2\text{SiO}_3$ , 123.485 g/L  $\text{ZnSO}_4$ , 0.178 g/L  $\text{CoCl}_2 \cdot 6\text{H}_2\text{O}$ , 1.458 g/L  $\text{CuSO}_4$ ). This media  
559 combination was used to minimize selection effects of growing in a fully complex medium, while  
560 providing enough nutrients for the frozen cells to revive. Resurrected populations were grown  
561 for 24 hr at 37 °C on a roller drum before being vortexed for 10 seconds, twice, to ensure biofilm  
562 growth was disrupted from the sides of the glass tube.

563 Growth curves were measured for resurrected populations in 96 well plates, at 37 °C. All  
564 growth curves were started at an  $\text{OD}_{600}$  of 0.01 and growth was measured every 10 min

565 following 9 min of shaking for 24 hr in M63 media with trace elements. Maximum growth rate  
566 was determined for the average of all replicates, by using the following equation:

567 
$$r = \frac{\Delta \log (OD_{600})}{\Delta t}$$

568 Census population size was calculated by diluting resurrected populations 1:100 in 5 mL  
569 M63 media with trace elements. One 7 mm polystyrene bead was added to each biofilm culture  
570 at time zero. After 24 hr growth, all populations were vortexed for 30 seconds and then diluted  
571 and plated in triplicate on tryptic soy agar and grown at 37 °C for 48 hrs. Average colony counts  
572 of the three technical replicates were reported for each population. Additionally, populations  
573 plated for census population size were also used for pH measurements as they were complete  
574 replications of experimental conditions. Average pH of triplicate readings are reported.

575 Biofilm assays were performed on resurrected populations diluted to an OD<sub>600</sub> of 0.01 in  
576 M63 media and grown in a 96 well plate under static conditions for 24 hr at 37 °C. Media was  
577 discarded and the plate was washed twice with deionized H<sub>2</sub>O, which was also discarded. Wells  
578 were then stained with the addition of 250 µl 0.1% crystal violet solution for 15 minutes. Plates  
579 were rinsed to remove excess dye and the plate was allowed to dry for 24 hours. A de-stain  
580 solution (95% ethanol, 4.95% dH<sub>2</sub>O, and 0.05% Triton X-100 (fisher bioreagents)) was added to  
581 wells (250 µl per well), and, after a 15-minute incubation, was transferred to a new 96 well plate.  
582 Crystal violet absorbance readings were measured at 590 nm. Reported values are the average  
583 of 21 replicates, done across three plates (7 technical replicates per plate). Data were analyzed  
584 with a one-way ANOVA with post hoc Tukey test.

585 Motility assays were performed as described previously (Ha, et al 2014). Briefly, pipet  
586 tips were dipped into resurrected populations and stabbed into motility agar (0.3% agar, 6 g/L  
587 Na<sub>2</sub>HPO<sub>4</sub>, 3 g/L KH<sub>2</sub>PO<sub>4</sub>, 0.5 g/L NaCl, 0.2% glucose, 0.5% casamino acids, 1 mM MgSO<sub>4</sub>).  
588 Increased or decreased motility was determined for all day 90 evolved populations as the  
589 diameter of bacterial growth after 24 hr growth at 37 °C compared to the clonal ancestor.

590 Reported values are the average of 5 replicates. Results were analyzed by one-way ANOVA  
591 with post hoc Tukey test.

### 592 **Mutation rate estimate**

593 Isogenic mutants of biofilm evolved mutator alleles *mutS* T112P and *mutL* D467G were  
594 used as reported previously (Flynn et al. 2016). Briefly, the two mutator strains and the PA14  
595 ancestor were revived from freezer stocks by streaking on ½ tryptic soy agar. After 24 hrs growth  
596 individual colonies were used to start 30 replicate 5-ml cultures for each strain. After 24 hrs  
597 growth at 37° F on a roller drum, populations were diluted and plated on ½ tryptic soy agar both  
598 with and without 1mg/ml Ciprofloxacin as a selective agent. Colonies were counted after a 24  
599 hour incubation period on both the antibiotic and non-antibiotic plate. We then calculated the  
600 fold change in mutation rate using the maximum likelihood method of Gerrish (2008). We  
601 performed measurements for all strains simultaneously to minimize variation. Reported values  
602 are the average fold change of all replicates.

### 603 **Genomic sequencing of evolved metagenomes**

604 DNA was isolated from biofilm populations at 113, 167, 293, 440, 500, and 600  
605 generations (17, 25, 44, 66, 75, and 90 days) and from planktonic populations at 113, 293, 500,  
606 and 600 generations (17, 44, 66, and 90 days). Culture media for DNA isolation was composed  
607 of 4:1 M63 to LB media. DNA was isolated from 1 mL resurrected populations using Qiagen's  
608 DNeasy Blood & Tissue Kit. Library construction was done using the Illumina Nextera kit as  
609 described previously (Baym 2015). Libraries were sequenced on Illumina's NextSeq 500  
610 platform by the Microbial Genome Sequencing Center at the University of Pittsburgh. Between  
611 13,545,344 and 46,890,487 reads were obtained for each sample, resulting in coverage of 265x  
612 - 860x per sample.

### 613 **Determining mutational frequencies from sequencing data**

614 Initial metagenomics sequencing efforts of the six populations resulted in 121.2 gbps of  
615 2x151 bp sequencing reads, that we trimmed and quality filtered with trimmomatic v0.36 using



616 default parameters(Bolger et al. 2014). The breseq software package v0.31.0 was used to align  
617 the filtered reads to the reference PA14 genome (NCBI's RefSeq database: NC\_008463.1) and  
618 make polymorphism calls(Barrick et al. 2014). All populations were run using the polymorphism  
619 mode of breseq with a sliding window of 5 bp and a quality score cutoff of 10. This analysis was  
620 done for every population and every time point sequenced. The genome of the ancestral strain  
621 differed from the reference by 435 mutations, which were removed from all evolved population  
622 samples before any downstream analysis to remove mutations that did not evolve over the  
623 course of the evolution.

624 All 12,250 resulting mutation calls were filtered in R (v3.5.1, <sup>5</sup>) to require a mutation to be  
625 called by at least 3 reads on each strand (positive and negative). Finally, mutations were filtered  
626 to remove regions of high polymorphism. Due to the abundance of repetitive regions in the  
627 PA14 genome the false positive rate is high. We therefore examined each call using the  
628 alignments produced by breseq and excluded mutations with high sequence variation within the  
629 15 bases both upstream and downstream of the called mutation. Mutations were also filtered for  
630 known regions of misalignment such as repeat regions before consolidation into time-series  
631 tables containing all real mutated loci for each evolved population (Table S1). The resulting 874  
632 mutations were then used as input in the software package LOLIPop Version 0.8.1. using –  
633 similarity-cutoff value of 0.1 for P1, P2, P3, and B1 and a --similarity-cutoff of 0.2 for populations  
634 B2 and B3. Increased similarity cutoffs increased the amount of mutations that were grouped  
635 into a genotype. Types of mutations were broken down by both nucleotide and amino acid  
636 mutation for all evolved populations in R. All scripts for the R filtering and analysis are available  
637 on github at: <https://github.com/KatrinaHarris23/PALTEanalysis>

### 638 **Calculating dN/dS ratios**

639 To determine the dN/dS ratios, first the dN/dS ratio for each of the 64 codons was calculated.  
640 The codon usage for the ancestral, PA14, genome was obtained from  
641 (<http://www.kazusa.or.jp/codon/>). The two resulting matrices were multiplied to obtain a neutral

642 ratio of nonsynonymous to synonymous substitutions (dN/dS ratio) of 2.96 for the ancestral  
643 UCBPP-PA14 genome (script for calculating this can be found on github here  
644 [https://github.com/KatrinaHarris23/PALTEanalysis/blob/master/dnds\\_calculator](https://github.com/KatrinaHarris23/PALTEanalysis/blob/master/dnds_calculator)). All reported  
645 dN/dS ratios are standardized according to this number with the final number reported being a  
646 result of the following equation:

$$647 \quad dN/dS = \frac{\frac{\#nonsynonymous}{\#synonymous}}{2.96}$$

### 648 **Experimentally determining ecologically enriched mutations**

649 To determine if mutations were specific to the biofilm lifestyle steps of swimming or  
650 attaching, we isolated DNA from evolved populations after additional strong selection in two  
651 distinct environments (Figure 5). Populations were resurrected from day 90 archives for the B1,  
652 B2, P1, and P2 populations by using 50 ul of the frozen stock into 5 ml resurrection media. After  
653 24 hr growth at 37°C each culture was used to inoculate 2 identical 5 ml M63 arginine media  
654 cultures. Two 8mm polystyrene beads were added to one replicate, creating movable biofilm,  
655 before both inoculated cultures were placed at 37°C. One transfer was performed for all  
656 populations at 24 hr. Swimming was selected for by transferring liquid phase growth form  
657 replicates with no beads to a new tube with 5 ml M63 arginine media. Additionally, one bead  
658 from replicates with beads was rinsed with PBS and subsequently transferred to a fresh tube of  
659 5 ml M63 media with two differently colored beads. After a final 24 hr incubation at 37°C  
660 “planktonically enriched” DNA samples were isolated from 0.5 ml liquid phase from replicates  
661 without beads. Growth from the two colored beads, first rinsed in PBS, then sonicated in 1 ml  
662 PBS was used in total for our “biofilm enriched” DNA sample. DNA was isolated using the  
663 Quiagen DNeasy Blood and Tissue kit.

664 Between 328 - 410x coverage was obtained for all eight samples. Mutations were filtered  
665 by removing all ancestral mutations, and only mutations detected by both biofilm and planktonic

666 samples for a given population were considered. This sequencing effort resulted in 979, 1021,  
667 879, and 876 mutations in the B1, B2, P1 and P2 populations respectively. Relative frequencies  
668 of mutations in the two environments were plotted in R using the ggplot2 package (Figure S8;  
669 code used in this analysis is found on github  
670 [https://github.com/KatrinaHarris23/PALTEanalysis/blob/master/201020\\_ecological\\_interactions.](https://github.com/KatrinaHarris23/PALTEanalysis/blob/master/201020_ecological_interactions)  
671 [R](#) ).

## 672 **Clonal sequencing**

673 To acquire clonal DNA, populations were resurrected in 4ml M63 arginine media with  
674 1ml LB and grown for 24 hr at 37 on a roller drum. Populations were then plated on ½ Tsoy  
675 plates down to the -6 dilution to isolate individual colonies. After 24 hr growth and 37 followed by  
676 48 hr room temperature growth clones were selected ensuring that all visible colony  
677 morphologies were sampled. Colony growth was picked up and used as inoculum for 5 ml LB  
678 cultures. After 24 hr at 37 on a roller drum 1 ml of culture was used for archiving (9% DMSO)  
679 and 0.5 ml was used for DNA isolation using the DNeasy Blood and tissue kit. Named clones  
680 that were reported previously (Flynn et al. 2016) were already archived and archives were used  
681 for resurrection directly into 5 ml LB.

682 DNA sequencing was performed as with population sequencing, but only requiring 30x  
683 coverage per sample. All reads were trimmed with trimmomatic, as populations were, and  
684 variant calling was performed using Breseq software default settings. As clonal samples are  
685 only looking for mutations that fix in each sample, filtering was only performed to remove  
686 ancestral mutations before analysis.

## 687 **Statistical testing**

688 Alpha diversity was calculated for all detected mutations in each population at each time  
689 point. We used the “shannon”, “simpson” and “invsimpson”, modes of the diversity function in R.  
690 Populations were grouped by growth environment, biofilm (n = 3) and planktonic (n = 3), and by

691 mutator allele presence (n = 4) or absence (n = 2). T-tests were performed in Prism (version 8,  
692 [www.graphpad.com](http://www.graphpad.com), Figure S4).

693 To perform the Fisher's exact test, a table of loci observed mutated 2 or more times was  
694 generated from the final mutation calls. Locus length was determined using  
695 <http://pseudomonas.com> as either gene length or the distance between surrounding genes for  
696 intergenic regions. Fisher's exact test was performed using this compiled list: the numbers of  
697 mutations per loci, the total number of mutations observed (624), and the PA14 genome length  
698 (6537648). Testing was performed using the `fisher.test()` function in R and only loci with p-  
699 values lower than 0.05 were used for parallelism analysis. 153 loci were tested for parallelism  
700 and then the number of false positives were reduced using the Benjamini-Hochberg correction  
701 with a false discovery rate of 5%. The equation used was  $(i/m)Q$  where  $i$  is the p-value rank,  $m$   
702 is the total number of tests, and  $Q$  is the false discovery rate.

703 Finally, ecological enrichment significance was calculated in R by using Cook's distance.  
704 First, a linear regression was calculated for each population using planktonic versus biofilm  
705 frequencies using the `lm()` function. Cook's distance was then calculated for each point, using  
706 `cooks.distance()` function. A mutation was considered significantly enriched if its distance was  
707 four times the mean distance or more.

### 708 **Principal component analysis (PCA)**

709 All PCA calculations and plotting were performed in R. Principal components were  
710 computed from the biofilm production, swimming motility, and maximum growth rate ( $V_{max}$ )  
711 data, and from the mutational frequency data at each sampled day using the `prcomp()` function.  
712 Plotting was done using the `autoplot()` function that is part of the `ggfortify` package.

713

### 714 **Acknowledgements**

715 This work was supported by NASA CAN-7 NNA15BB04A and a Research Development Pilot  
716 award from the Cystic Fibrosis Foundation to VSC. We thank Dan Snyder and Ann Donnelly for  
717 critical feedback and Christopher Deitrick for support in implementing the lolipop package.

718 Bibliography

- 719 Ashish A, Paterson S, Mowat E, Fothergill JL, Walshaw MJ, Winstanley C. 2013. Extensive  
720 diversification is a common feature of *Pseudomonas aeruginosa* populations during  
721 respiratory infections in cystic fibrosis. *J. Cyst. Fibros. Off. J. Eur. Cyst. Fibros. Soc.*  
722 12:790–793.
- 723 Badal D, Jayarani AV, Kollaran MA, Kumar A, Singh V. 2020. *Pseudomonas aeruginosa* biofilm  
724 formation on endotracheal tubes requires multiple two-component systems. *J. Med.*  
725 *Microbiol.* 69:906–919.
- 726 Barghi N, Hermisson J, Schlötterer C. 2020. Polygenic adaptation: a unifying framework to  
727 understand positive selection. *Nat. Rev. Genet.* 21:769–781.
- 728 Barrett RDH, MacLean RC, Bell G. 2005. Experimental Evolution of *Pseudomonas fluorescens*  
729 in Simple and Complex Environments. *Am. Nat.* 166:470–480.
- 730 Barrick JE, Colburn G, Deatherage DE, Traverse CC, Strand MD, Borges JJ, Knoester DB,  
731 Reba A, Meyer AG. 2014. Identifying structural variation in haploid microbial genomes  
732 from short-read resequencing data using breseq. *BMC Genomics* 15:1039.
- 733 Basta DW, Bergkessel M, Newman DK. 2017. Identification of Fitness Determinants during  
734 Energy-Limited Growth Arrest in *Pseudomonas aeruginosa*. *mBio* [Internet] 8. Available  
735 from: <https://mbio.asm.org/content/8/6/e01170-17>
- 736 Bernier SP, Ha D-G, Khan W, Merritt JH, O'Toole GA. 2011. Modulation of *Pseudomonas*  
737 *aeruginosa* surface-associated group behaviors by individual amino acids through c-di-  
738 GMP signaling. *Res. Microbiol.* 162:680–688.
- 739 Birky CW, Walsh JB. 1988. Effects of linkage on rates of molecular evolution. *Proc. Natl. Acad.*  
740 *Sci.* 85:6414–6418.
- 741 Blanche F, Famechon A, Thibaut D, Debussche L, Cameron B, Crouzet J. 1992. Biosynthesis of  
742 vitamin B12 in *Pseudomonas denitrificans*: the biosynthetic sequence from precorrin-6y  
743 to precorrin-8x is catalyzed by the cobL gene product. *J. Bacteriol.* 174:1050–1052.
- 744 Boles BR, Thoendel M, Singh PK. 2004. Self-generated diversity produces “insurance effects” in  
745 biofilm communities. *Proc. Natl. Acad. Sci.* 101:16630–16635.
- 746 Bolger AM, Lohse M, Usadel B. 2014. Trimmomatic: a flexible trimmer for Illumina sequence  
747 data. *Bioinforma. Oxf. Engl.* 30:2114–2120.
- 748 Booth SC, Workentine ML, Wen J, Shaykhutdinov R, Vogel HJ, Ceri H, Turner RJ, Weljie AM.  
749 2011. Differences in Metabolism between the Biofilm and Planktonic Response to Metal  
750 Stress. *J. Proteome Res.* 10:3190–3199.
- 751 Buskirk SW, Peace RE, Lang GI. 2017. Hitchhiking and epistasis give rise to cohort dynamics in  
752 adapting populations. *Proc. Natl. Acad. Sci.* 114:8330–8335.
- 753 cdeitrick. 2020. cdeitrick/Lolipop. Available from: <https://github.com/cdeitrick/Lolipop>

- 754 Ciofu O, Mandsberg LF, Bjarnsholt T, Wassermann T, Høiby N. 2010. Genetic adaptation of  
755 *Pseudomonas aeruginosa* during chronic lung infection of patients with cystic fibrosis:  
756 strong and weak mutators with heterogeneous genetic backgrounds emerge in *muca*  
757 and/or *lasR* mutants. *Microbiology*, 156:1108–1119.
- 758 Comeron JM, Williford A, Kliman RM. 2008. The Hill–Robertson effect: evolutionary  
759 consequences of weak selection and linkage in finite populations. *Heredity* 100:19–31.
- 760 Conrad TM, Frazier M, Joyce AR, Cho B-K, Knight EM, Lewis NE, Landick R, Palsson BO.  
761 2010. RNA polymerase mutants found through adaptive evolution reprogram  
762 *Escherichia coli* for optimal growth in minimal media. *Proc. Natl. Acad. Sci.* 107:20500–  
763 20505.
- 764 Cooper VS. 2018. Experimental Evolution as a High-Throughput Screen for Genetic  
765 Adaptations. *mSphere* 3:e00121-18.
- 766 Couce A, Caudwell LV, Feinauer C, Hindré T, Feugeas J-P, Weigt M, Lenski RE, Schneider D,  
767 Tenaillon O. 2017. Mutator genomes decay, despite sustained fitness gains, in a long-  
768 term experiment with bacteria. *Proc. Natl. Acad. Sci.* 114:E9026–E9035.
- 769 Cunin R, Glansdorff N, Piérard A, Stalon V. 1986. Biosynthesis and metabolism of arginine in  
770 bacteria. *Microbiol. Rev.* 50:314–352.
- 771 Davies JA, Harrison JJ, Marques LLR, Foglia GR, Stremick CA, Storey DG, Turner RJ, Olson  
772 ME, Ceri H. 2007. The GacS sensor kinase controls phenotypic reversion of small  
773 colony variants isolated from biofilms of *Pseudomonas aeruginosa* PA14. *FEMS*  
774 *Microbiol. Ecol.* 59:32–46.
- 775 Dietrich LEP, Okegbe C, Price-Whelan A, Sakhtah H, Hunter RC, Newman DK. 2013. Bacterial  
776 community morphogenesis is intimately linked to the intracellular redox state. *J.*  
777 *Bacteriol.* 195:1371–1380.
- 778 Eichner A, Günther N, Arnold M, Schobert M, Heesemann J, Hogardt M. 2014. Marker genes  
779 for the metabolic adaptation of *Pseudomonas aeruginosa* to the hypoxic cystic fibrosis  
780 lung environment. *Int. J. Med. Microbiol. IJMM* 304:1050–1061.
- 781 Ellis CN, Schuster BM, Striplin MJ, Jones SH, Whistler CA, Cooper VS. 2012. Influence of  
782 seasonality on the genetic diversity of *Vibrio parahaemolyticus* in New Hampshire  
783 shellfish waters as determined by multilocus sequence analysis. *Appl. Environ.*  
784 *Microbiol.* 78:3778–3782.
- 785 Feliziani S, Marvig RL, Luján AM, Moyano AJ, Di Rienzo JA, Krogh Johansen H, Molin S,  
786 Smania AM. 2014. Coexistence and Within-Host Evolution of Diversified Lineages of  
787 Hypermutable *Pseudomonas aeruginosa* in Long-term Cystic Fibrosis  
788 Infections. *PLoS Genet* 10:e1004651.
- 789 Feliziani S, Marvig RL, Luján AM, Moyano AJ, Rienzo JAD, Johansen HK, Molin S, Smania AM.  
790 2014. Coexistence and Within-Host Evolution of Diversified Lineages of Hypermutable  
791 *Pseudomonas aeruginosa* in Long-term Cystic Fibrosis Infections. *PLoS Genet.*  
792 10:e1004651.

- 793 Flynn KM, Dowell G, Johnson TM, Koestler BJ, Waters CM, Cooper VS. 2016. Evolution of  
794 Ecological Diversity in Biofilms of *Pseudomonas aeruginosa* by Altered Cyclic  
795 Diguanylate Signaling. *J. Bacteriol.* 198:2608–2618.
- 796 Francis VI, Stevenson EC, Porter SL. 2017. Two-component systems required for virulence in  
797 *Pseudomonas aeruginosa*. *FEMS Microbiol. Lett.* [Internet] 364. Available from:  
798 <https://academic.oup.com/femsle/article/364/11/fnx104/3828290>
- 799 Gellatly SL, Bains M, Breidenstein EBM, Strehmel J, Reffuveille F, Taylor PK, Yeung ATY,  
800 Overhage J, Hancock REW. 2018. Novel roles for two-component regulatory systems in  
801 cytotoxicity and virulence-related properties in *Pseudomonas aeruginosa*. *AIMS*  
802 *Microbiol.* 4:173–191.
- 803 Gloag ES, Marshall CW, Snyder D, Lewin GR, Harris JS, Santos-Lopez A, Chaney SB,  
804 Whiteley M, Cooper VS, Wozniak DJ. 2019. *Pseudomonas aeruginosa* Interstrain  
805 Dynamics and Selection of Hyperbiofilm Mutants during a Chronic Infection. *mBio*  
806 [Internet] 10. Available from: <https://mbio.asm.org/content/10/4/e01698-19>
- 807 Good BH, McDonald MJ, Barrick JE, Lenski RE, Desai MM. 2017. The Dynamics of Molecular  
808 Evolution Over 60,000 Generations. *Nature* 551:45–50.
- 809 Good BH, Walczak AM, Neher RA, Desai MM. 2014. Genetic Diversity in the Interference  
810 Selection Limit. *PLOS Genet.* 10:e1004222.
- 811 Ha D-G, Richman ME, O’Toole GA. 2014. Deletion Mutant Library for Investigation of Functional  
812 Outputs of Cyclic Diguanylate Metabolism in *Pseudomonas aeruginosa* PA14. *Appl Env.*  
813 *Microbiol* 80:3384–3393.
- 814 Habets MGJL, Rozen DE, Hoekstra RF, de Visser JAGM. 2006. The effect of population  
815 structure on the adaptive radiation of microbial populations evolving in spatially  
816 structured environments. *Ecol. Lett.* 9:1041–1048.
- 817 Hoboth C, Hoffmann R, Eichner A, Henke C, Schmoldt S, Imhof A, Heesemann J, Hogardt M.  
818 2009. Dynamics of Adaptive Microevolution of Hypermutable *Pseudomonas aeruginosa*  
819 during Chronic Pulmonary Infection in Patients with Cystic Fibrosis. *J. Infect. Dis.*  
820 200:118–130.
- 821 Hogardt M, Heesemann J. 2013. Microevolution of *Pseudomonas aeruginosa* to a Chronic  
822 Pathogen of the Cystic Fibrosis Lung. In: Dobrindt U, Hacker JH, Svanborg C, editors.  
823 Between Pathogenicity and Commensalism. Current Topics in Microbiology and  
824 Immunology. Berlin, Heidelberg: Springer. p. 91–118. Available from:  
825 [https://doi.org/10.1007/82\\_2011\\_199](https://doi.org/10.1007/82_2011_199)
- 826 Junop MS, Yang W, Funchain P, Clendenin W, Miller JH. 2003. In vitro and in vivo studies of  
827 MutS, MutL and MutH mutants: correlation of mismatch repair and DNA recombination.  
828 *DNA Repair* 2:387–405.
- 829 Kaczanowska M, Rydén-Aulin M. 2007. Ribosome Biogenesis and the Translation Process in  
830 *Escherichia coli*. *Microbiol. Mol. Biol. Rev. MMBR* 71:477–494.



- 831 Khademi SMH, Sazinas P, Jelsbak L. 2019. Within-Host Adaptation Mediated by Intergenic  
832 Evolution in *Pseudomonas aeruginosa*. *Genome Biol. Evol.* 11:1385–1397.
- 833 Kim W, Racimo F, Schluter J, Levy SB, Foster KR. 2014. Importance of positioning for microbial  
834 evolution. *Proc. Natl. Acad. Sci. U. S. A.* 111:E1639-1647.
- 835 Konikkat S, Scribner MR, Eutsey R, Hiller NL, Cooper VS, McManus CJ. 2020. Quantitative  
836 mapping of mRNA 3' ends in *Pseudomonas aeruginosa* reveals putative riboregulators  
837 and a pervasive role for transcription termination in response to azithromycin.  
838 Microbiology Available from: <http://biorxiv.org/lookup/doi/10.1101/2020.06.16.155515>
- 839 Krishnan K, Flower AM. 2008. Suppression of  $\Delta$ bipA Phenotypes in *Escherichia coli* by  
840 Abolishment of Pseudouridylation at Specific Sites on the 23S rRNA. *J. Bacteriol.*  
841 190:7675–7683.
- 842 Kruczek C, Kottapalli KR, Dissanaik S, Dzvova N, Griswold JA, Colmer-Hamood JA, Hamood  
843 AN. 2016. Major Transcriptome Changes Accompany the Growth of *Pseudomonas*  
844 *aeruginosa* in Blood from Patients with Severe Thermal Injuries. *PLOS ONE*  
845 11:e0149229.
- 846 Kryazhimskiy S, Plotkin JB. 2008. The Population Genetics of dN/dS. *PLOS Genet.*  
847 4:e1000304.
- 848 Lang GI, Rice DP, Hickman MJ, Sodergren E, Weinstock GM, Botstein D, Desai MM. 2013.  
849 Pervasive Genetic Hitchhiking and Clonal Interference in 40 Evolving Yeast Populations.  
850 *Nature* 500:571–574.
- 851 Lenski RE, Rose MR, Simpson SC, Tadler SC. 1991. Long-Term Experimental Evolution in  
852 *Escherichia coli*. I. Adaptation and Divergence During 2,000 Generations. *Am. Nat.*  
853 138:1315–1341.
- 854 Lieberman TD, Michel J-B, Aingaran M, Potter-Bynoe G, Roux D, Davis MR, Skurnik D, Leiby  
855 N, LiPuma JJ, Goldberg JB, et al. 2011. Parallel bacterial evolution within multiple  
856 patients identifies candidate pathogenicity genes. *Nat. Genet.* 43:1275–1280.
- 857 López-Causapé C, Rojo-Molinero E, Mulet X, Cabot G, Moyà B, Figuerola J, Togores B, Pérez  
858 JL, Oliver A. 2013. Clonal Dissemination, Emergence of Mutator Lineages and Antibiotic  
859 Resistance Evolution in *Pseudomonas aeruginosa* Cystic Fibrosis Chronic Lung  
860 Infection. *PLOS ONE* 8:e71001.
- 861 Lu C-D. 2006. Pathways and regulation of bacterial arginine metabolism and perspectives for  
862 obtaining arginine overproducing strains. *Appl. Microbiol. Biotechnol.* 70:261–272.
- 863 Macià MD, Pérez JL, Molin S, Oliver A. 2011. Dynamics of Mutator and Antibiotic-Resistant  
864 Populations in a Pharmacokinetic/Pharmacodynamic Model of *Pseudomonas*  
865 *aeruginosa* Biofilm Treatment. *Antimicrob. Agents Chemother.* 55:5230–5237.
- 866 Martin M, Hölscher T, Dragoš A, Cooper VS, Kovács ÁT. 2016. Laboratory Evolution of  
867 Microbial Interactions in Bacterial Biofilms. *J. Bacteriol.* 198:2564–2571.

- 868 Marvig RL, Dolce D, Sommer LM, Petersen B, Ciofu O, Campana S, Molin S, Taccetti G,  
869 Johansen HK. 2015. Within-host microevolution of *Pseudomonas aeruginosa* in Italian  
870 cystic fibrosis patients. *BMC Microbiol.* 15:218.
- 871 McVean GAT, Charlesworth B. 2000. The Effects of Hill-Robertson Interference Between  
872 Weakly Selected Mutations on Patterns of Molecular Evolution and Variation. *Genetics*  
873 155:929–944.
- 874 Morgan R, Kohn S, Hwang S-H, Hassett DJ, Sauer K. 2006. BdlA, a Chemotaxis Regulator  
875 Essential for Biofilm Dispersion in *Pseudomonas aeruginosa*. *J. Bacteriol.* 188:7335–  
876 7343.
- 877 Nicastro GG, Boechat AL, Abe CM, Kaihami GH, Baldini RL. 2009. *Pseudomonas aeruginosa*  
878 PA14 cupD transcription is activated by the RcsB response regulator, but repressed by  
879 its putative cognate sensor RcsC. *FEMS Microbiol. Lett.* 301:115–123.
- 880 O’Sullivan DM, McHugh TD, Gillespie SH. 2005. Analysis of rpoB and pncA mutations in the  
881 published literature: an insight into the role of oxidative stress in *Mycobacterium*  
882 tuberculosis evolution? *J. Antimicrob. Chemother.* 55:674–679.
- 883 O’Toole G, Kaplan HB, Kolter R. 2000. Biofilm Formation as Microbial Development. *Annu. Rev.*  
884 *Microbiol.* 54:49–79.
- 885 Parsek MR, Singh PK. 2003. Bacterial biofilms: an emerging link to disease pathogenesis.  
886 *Annu. Rev. Microbiol.* 57:677–701.
- 887 Periasamy S, Kolenbrander PE. 2009. Mutualistic biofilm communities develop with  
888 *Porphyromonas gingivalis* and initial, early, and late colonizers of enamel. *J. Bacteriol.*  
889 191:6804–6811.
- 890 Petrova OE, Sauer K. 2016. Escaping the biofilm in more than one way: desorption, detachment  
891 or dispersion. *Curr. Opin. Microbiol.* 30:67–78.
- 892 Poltak SR, Cooper VS. 2011. Ecological succession in long-term experimentally evolved  
893 biofilms produces synergistic communities. *ISME J.* 5:369–378.
- 894 Rainey PB, Travisano M. 1998. Adaptive radiation in a heterogeneous environment. *Nature*  
895 394:69–72.
- 896 Raynes Y, Sniegowski PD, Weinreich DM. 2019. Migration promotes mutator alleles in  
897 subdivided populations. *Evolution* 73:600–608.
- 898 Resch A, Rosenstein R, Nerz C, Götz F. 2005. Differential Gene Expression Profiling of  
899 *Staphylococcus aureus* Cultivated under Biofilm and Planktonic Conditions. *Appl.*  
900 *Environ. Microbiol.* 71:2663–2676.
- 901 Santos-Lopez A, Marshall CW, Scribner MR, Snyder DJ, Cooper VS. 2019. Evolutionary  
902 pathways to antibiotic resistance are dependent upon environmental structure and  
903 bacterial lifestyle. Kirkegaard K, Margolis E, editors. *eLife* 8:e47612.

- 904 Sanz-García F, Hernando-Amado S, Martínez JL. 2018. Mutational Evolution of *Pseudomonas*  
905 *aeruginosa* Resistance to Ribosome-Targeting Antibiotics. *Front. Genet.* [Internet] 9.  
906 Available from: <https://www.ncbi.nlm.nih.gov/pmc/articles/PMC6200844/>
- 907 Sawai H, Sugimoto H, Shiro Y, Ishikawa H, Mizutani Y, Aono S. 2012. Structural basis for  
908 oxygen sensing and signal transduction of the heme-based sensor protein Aer2 from  
909 *Pseudomonas aeruginosa*. *Chem. Commun.* 48:6523–6525.
- 910 Schick A, Kassen R. 2018. Rapid diversification of *Pseudomonas aeruginosa* in cystic fibrosis  
911 lung-like conditions. *Proc. Natl. Acad. Sci.* 115:10714–10719.
- 912 Scribner MR, Santos-Lopez A, Marshall CW, Deitrick C, Cooper VS. 2019. Parallel evolution of  
913 tobramycin resistance across species and environments. *bioRxiv:758979*.
- 914 Shaver AC, Dombrowski PG, Sweeney JY, Treis T, Zappala RM, Sniegowski PD. 2002. Fitness  
915 evolution and the rise of mutator alleles in experimental *Escherichia coli* populations.  
916 *Genetics* 162:557–566.
- 917 Smith JM, Haigh J. 1974. The hitch-hiking effect of a favourable gene. *Genet. Res.* 23:23–35.
- 918 Sniegowski PD, Gerrish PJ, Lenski RE. 1997. Evolution of high mutation rates in experimental  
919 populations of *E. coli*. *Nature* 387:703–705.
- 920 Stoodley P, Sauer K, Davies DG, Costerton JW. 2002. Biofilms as complex differentiated  
921 communities. *Annu Rev Microbiol* 56:187–209.
- 922 Tognon M, Köhler T, Gdaniec BG, Hao Y, Lam JS, Beaume M, Luscher A, Buckling A, van  
923 Delden C. 2017. Co-evolution with *Staphylococcus aureus* leads to lipopolysaccharide  
924 alterations in *Pseudomonas aeruginosa*. *ISME J.* 11:2233–2243.
- 925 Traverse CC, Mayo-Smith LM, Poltak SR, Cooper VS. 2013. Tangled bank of experimentally  
926 evolved *Burkholderia* biofilms reflects selection during chronic infections. *Proc. Natl.*  
927 *Acad. Sci. U. S. A.* 110:E250-259.
- 928 Turner CB, Marshall CW, Cooper VS. 2018. Parallel genetic adaptation across environments  
929 differing in mode of growth or resource availability. *Evol. Lett.* 2:355–367.
- 930 Wagner VE, Bushnell D, Passador L, Brooks AI, Iglewski BH. 2003. Microarray Analysis of  
931 *Pseudomonas aeruginosa* Quorum-Sensing Regulons: Effects of Growth Phase and  
932 Environment. *J. Bacteriol.* 185:2080–2095.
- 933 Warren AE, Boulianne-Larsen CM, Chandler CB, Chiotti K, Kroll E, Miller SR, Taddei F, Sermet-  
934 Gaudelus I, Ferroni A, McInnerney K, et al. 2011. Genotypic and Phenotypic Variation in  
935 *Pseudomonas aeruginosa* Reveals Signatures of Secondary Infection and Mutator  
936 Activity in Certain Cystic Fibrosis Patients with Chronic Lung Infections. *Infect. Immun.*  
937 79:4802–4818.
- 938 Willsey GG, Wargo MJ. 2016. Sarcosine Catabolism in *Pseudomonas aeruginosa* Is  
939 Transcriptionally Regulated by SouR. *J. Bacteriol.* 198:301–310.

- 940 Winsor GL, Griffiths EJ, Lo R, Dhillon BK, Shay JA, Brinkman FSL. 2016. Enhanced annotations  
941 and features for comparing thousands of *Pseudomonas* genomes in the *Pseudomonas*  
942 genome database. *Nucleic Acids Res.* 44:D646–D653.
- 943 Wong A, Rodrigue N, Kassen R. 2012. Genomics of Adaptation during Experimental Evolution  
944 of the Opportunistic Pathogen *Pseudomonas aeruginosa*. *PLOS Genet.* 8:e1002928.
- 945 Xiao M, Zhu X, Xu H, Tang J, Liu R, Bi C, Fan F, Zhang X. 2017. A novel point mutation in  
946 RpoB improves osmotolerance and succinic acid production in *Escherichia coli*. *BMC*  
947 *Biotechnol.* [Internet] 17. Available from:  
948 <https://www.ncbi.nlm.nih.gov/pmc/articles/PMC5307762/>
- 949 Yen P, Papin JA. 2017. History of antibiotic adaptation influences microbial evolutionary  
950 dynamics during subsequent treatment. *PLoS Biol* 15:e2001586.
- 951 Yildiz FH, Visick KL. 2009. *Vibrio* biofilms: so much the same yet so different. *Trends Microbiol.*  
952 17:109–118.
- 953
